# Supplementary material
Source: PubMed Central journal article supplement (PMC10037203)

## Supplemental Online Content

Tsampasian V, Elghazaly H, Chattopadhyay R, et al. Risk factors associated with post-COVID-19 condition: a systematic review and meta-analysis. *JAMA Intern Med*. Published online March 23, 2023. doi:10.1001/jamainternmed.2023.0750

**eMethods.** Search Strategy in PubMed

**eTable 1.** Newcastle-Ottawa Quality Assessment table for included cohort studies

**eTable 2.** Meta-regression analysis by geographic location

**eFigure 1.** PRISMA flow diagram of the study selection process

**eFigure 2.** Funnel plots assessing publication bias for each group meta-analysis: A) Sex, B) Age, C) Body Mass Index, D) Smoking, E) Diabetes, F) IHD, G) COPD, H) CKD, I) Hospitalisation, J) ICU K) Vaccination

**eFigure 3.** Subgroup analysis of studies investigating the correlation of female sex and development of post-COVID-19 condition according to study population

**eFigure 4.** Subgroup analysis of studies investigating the correlation of female sex and development of post-COVID-19 condition according to study quality (as per the Newcastle- Ottawa Scale)

**eFigure 5.** Subgroup analysis of studies investigating the correlation of age and development of post-COVID-19 condition according to study size

**eFigure 6.** Meta-regression analysis bubble plot of studies investigating age as risk factor for post-COVID-19 condition.

**eFigure 7.** Subgroup analysis of studies investigating the correlation of age and development of post-COVID-19 condition according to study population

**eFigure 8.** Subgroup analysis of studies investigating the correlation of age and development of post-COVID-19 condition according to study quality (as per the Newcastle- Ottawa Scale)

**eFigure 9.** Forest plot showing the effect of BMI on post-COVID-19 condition. Individuals with higher BMI have an increased risk of developing post-COVID-19 condition.

**eFigure 10.** Subgroup analysis of studies investigating the correlation of obesity and development of post-COVID-19 condition according to study population

**eFigure 11.** Subgroup analysis of studies investigating the correlation of obesity and development of post-COVID-19 condition according to study quality (as per the Newcastle- Ottawa Scale)

**eFigure 12.** Subgroup analysis of studies investigating the correlation of smoking and development of post-COVID-19 condition according to study quality (as per the Newcastle- Ottawa Scale)

**eFigure 13.** Forest plot showing the effect of asthma on post-COVID-19 condition. Individuals with asthma have an increased risk of developing post-COVID-19 condition.

**eFigure 14.** Subgroup analysis of studies investigating the correlation of asthma and development of post-COVID-19 condition according to study size

**eFigure 15.** Forest plot showing the effect of COPD on Long COVID. Individuals with COPD have an increased risk of developing post-COVID-19 condition.

**eFigure 16.** Subgroup analysis of studies investigating the correlation of COPD and development of post-COVID-19 condition according to study quality (as per the Newcastle- Ottawa Scale)

**eFigure 17.** Forest plot showing the effect of diabetes on post–COVID-19 condition. Individuals with diabetes have an increased risk of developing post–COVID-19 condition.

**eFigure 18.** Subgroup analysis of studies investigating the correlation of diabetes and development of post–COVID-19 condition according to study quality (as per the Newcastle- Ottawa Scale)

**eFigure 19.** Forest plot showing the effect of CKD on post–COVID-19 condition. CKD was not significantly associated with post–COVID-19 condition.

**eFigure 20.** Subgroup analysis of studies investigating the correlation of CKD and development of post–COVID-19 condition according to study quality (as per the Newcastle- Ottawa Scale)

**eFigure 21.** Forest plot showing the association of IHD with post–COVID-19 condition. Individuals with IHD have an increased risk of developing post–COVID-19 condition.

**eFigure 22.** Subgroup analysis of studies investigating the correlation of IHD and development of post–COVID-19 condition according to study quality (as per the Newcastle- Ottawa Scale)

**eFigure 23.** Forest plot showing the association of immunosuppression with post–COVID-19 condition. Individuals with immunosuppression have an increased risk of developing post–COVID-19 condition.

**eFigure 24.** Forest plot showing the association of anxiety/depression with post–COVID-19 condition. Individuals with anxiety/depression have an increased risk of developing post–COVID-19 condition.

**eFigure 25.** Subgroup analysis of studies investigating the correlation of anxiety/ depression and development of post–COVID-19 condition according to study quality (as per the Newcastle-Ottawa Scale)

**eFigure 26.** Forest plot showing the association of hospitalisation with post–COVID-19 condition. Individuals that were hospitalised during the acute infection had an increased risk of developing post–COVID-19 condition.

**eFigure 27.** Subgroup analysis of studies investigating the correlation of hospitalisation and development of post–COVID-19 condition according to study quality (as per the Newcastle-Ottawa Scale)

**eFigure 28.** Forest plot showing the association of ICU admission with post–COVID-19 condition. Individuals that required ICU admission during the acute infection had an increased risk of developing post–COVID-19 condition.

**eFigure 29.** Subgroup analysis of studies investigating the correlation of ICU admission and development of post–COVID-19 condition according to study quality (as per the Newcastle-Ottawa Scale)

**eFigure 30.** Subgroup analysis of studies investigating the correlation of ICU admission and development of post–COVID-19 condition according to study size

**eFigure 31.** Sensitivity analysis of all the risk factors examined using only the studies that included patients with laboratory confirmed COVID-19 infection

**eFigure 32.** Sensitivity analysis of all the risk factors with studies that investigated  $\geq 5$  variables

This supplemental material has been provided by the authors to give readers additional information about their work.

## eMethods. Search Strategy in PubMed

1. Long COVID.mp. [mp=title, abstract, heading word, drug trade name, original title, device manufacturer, drug manufacturer, device trade name, keyword, floating subheading word, candidate term word]
2. Post COVID.mp. [mp=title, abstract, heading word, drug trade name, original title, device manufacturer, drug manufacturer, device trade name, keyword, floating subheading word, candidate term word]
3. Chronic COVID.mp. [mp=title, abstract, heading word, drug trade name, original title, device manufacturer, drug manufacturer, device trade name, keyword, floating subheading word, candidate term word]
4. 1 or 2 or 3
5. Risk\*.mp. [mp=title, abstract, heading word, drug trade name, original title, device manufacturer, drug manufacturer, device trade name, keyword, floating subheading word, candidate term word]
6. Variable\*.mp. [mp=title, abstract, heading word, drug trade name, original title, device manufacturer, drug manufacturer, device trade name, keyword, floating subheading word, candidate term word]
7. Predictor\*.mp. [mp=title, abstract, heading word, drug trade name, original title, device manufacturer, drug manufacturer, device trade name, keyword, floating subheading word, candidate term word]
8. Factor\*.mp. [mp=title, abstract, heading word, drug trade name, original title, device manufacturer, drug manufacturer, device trade name, keyword, floating subheading word, candidate term word]
9. 5 or 6 or 7 or 8
10. 4 and 9

**eTable 1.** Newcastle-Ottawa Quality Assessment table for included cohort studies

| Study                                       | Selection | Comparability | Outcome | Total | Quality of Study |
|---------------------------------------------|-----------|---------------|---------|-------|------------------|
| Abdelrahman et al. <sup>38</sup>            | ***       | **            | **      | 7     | High             |
| Aranda et al. <sup>39</sup>                 | ***       | **            | ***     | 8     | High             |
| Asadi-Pooya et al. <sup>40</sup>            | ***       | *             | **      | 6     | Moderate         |
| Augustin et al. <sup>41</sup>               | ***       | **            | **      | 7     | High             |
| Ayoubkhani et al. <sup>42</sup>             | ***       | **            | **      | 7     | High             |
| Baruch et al. <sup>43</sup>                 | ***       | **            | ***     | 8     | High             |
| Bellan et al. <sup>44</sup>                 | ***       | **            | **      | 7     | High             |
| Blomberg et al. <sup>45</sup>               | ***       | **            | ***     | 8     | High             |
| Chudzik et al. <sup>46</sup>                | ***       | **            | **      | 7     | High             |
| Daitch et al. <sup>47</sup>                 | ***       | **            | ***     | 8     | High             |
| Debski et al. <sup>48</sup>                 | ***       | **            | **      | 7     | High             |
| Dias et al. <sup>50</sup>                   | ***       | **            | **      | 7     | High             |
| Emecen et al. <sup>51</sup>                 | ***       | **            | **      | 7     | High             |
| Estrada-Codecido et al. <sup>52</sup>       | ***       | **            | **      | 7     | High             |
| Fernández-de-las-Peñas et al. <sup>53</sup> | ***       | *             | ***     | 7     | High             |
| Fernández-de-las-Peñas et al. <sup>54</sup> | ***       | **            | ***     | 8     | High             |
| Fernández-de-las-Peñas et al. <sup>55</sup> | ***       | **            | ***     | 8     | High             |
| Fernández-de-las-Peñas et al. <sup>56</sup> | ***       | **            | ***     | 8     | High             |
| Fernández-de-las-Peñas et al. <sup>57</sup> | ***       | **            | ***     | 8     | High             |
| Fernández-de-las-Peñas et al. <sup>58</sup> | ***       | **            | ***     | 8     | High             |
| Fernández-de-las-Peñas et al. <sup>59</sup> | ***       | *             | ***     | 7     | High             |
| Ioannou et al. <sup>60</sup>                | ***       | **            | ***     | 8     | High             |
| Jones et al. <sup>13</sup>                  | ***       | **            | ***     | 8     | High             |
| Kisiel et al. <sup>61</sup>                 | **        | **            | **      | 6     | Moderate         |
| Kostev et al. <sup>62</sup>                 | ***       | **            | **      | 7     | High             |
| Menezes et al. <sup>63</sup>                | **        | **            | **      | 6     | Moderate         |
| Munblit et al. <sup>64</sup>                | ***       | **            | **      | 7     | High             |
| Pazukhina et al. <sup>65</sup>              | **        | **            | **      | 6     | Moderate         |
| Peghin et al. <sup>66</sup>                 | ***       | **            | ***     | 8     | High             |
| Peters et al. <sup>67</sup>                 | **        | **            | **      | 6     | Moderate         |
| Petersen et al. <sup>68</sup>               | **        | **            | **      | 6     | Moderate         |
| Righi et al. <sup>69</sup>                  | ***       | **            | **      | 7     | High             |
| Silverberg et al. <sup>70</sup>             | **        | **            | **      | 6     | Moderate         |
| Štěpánek et al. <sup>71</sup>               | **        | **            | **      | 6     | Moderate         |
| Subramanian et al. <sup>72</sup>            | ***       | **            | ***     | 8     | High             |
| Thompson et al. <sup>24</sup>               | ***       | **            | ***     | 8     | High             |
| Tleyjeh et al. <sup>73</sup>                | **        | **            | **      | 6     | Moderate         |
| Whitaker et al. <sup>74</sup>               | ***       | **            | **      | 7     | High             |
| Wu et al. <sup>75</sup>                     | ***       | **            | **      | 7     | High             |
| Zhang et al. <sup>76</sup>                  | **        | **            | ***     | 7     | High             |
| Zisis et al. <sup>77</sup>                  | ***       | **            | ***     | 8     | High             |

\*Each star indicates a point for each component. Any study can obtain a maximum of four, two and three stars for each component (selection, comparability, outcomes) respectively. Trials with a total score of 7 or higher are considered to be high-quality studies, and those lower than 5 are considered as low-quality studies. These scores indicate at least moderate quality of the included trials.

**eTable 2. Meta-regression analysis by geographic location**

| <b>Risk factor</b> | <b>Geographic location</b> | <b>Significance (p value)</b> |
|--------------------|----------------------------|-------------------------------|
| Female Sex         | America                    | 0.49                          |
|                    | Asia                       | 0.74                          |
|                    | Europe                     | 0.85                          |
|                    | International              | 0.84                          |
| Age                | Asia                       | 0.97                          |
|                    | Europe                     | 0.19                          |
| Obesity            | Europe                     | 0.76                          |
|                    | International              | 0.12                          |
| Smoking            | America                    | 0.82                          |
|                    | Asia                       | 0.54                          |
|                    | Europe                     | 0.48                          |
| Diabetes           | Europe                     | <b>0.02</b>                   |
| Asthma             | Europe                     | <b>&lt;0.001</b>              |
| IHD                | Europe                     | 0.54                          |
| CKD                | Europe                     | 0.12                          |
| COPD               | Europe                     | 0.49                          |
|                    | International              | 0.59                          |
| Immunosuppression  | Europe                     | 0.75                          |
| Anxiety/Depression | Europe                     | 0.84                          |
| Hospitalisations   | America                    | 0.88                          |
|                    | Asia                       | 0.56                          |
|                    | Europe                     | 0.75                          |
| ICU admissions     | Asia                       | 0.35                          |
|                    | Europe                     | 0.36                          |
| Vaccination status | Asia                       | 0.89                          |
|                    | Europe                     | 0.97                          |

**eFigure 1.** PRISMA flow diagram of the study selection process

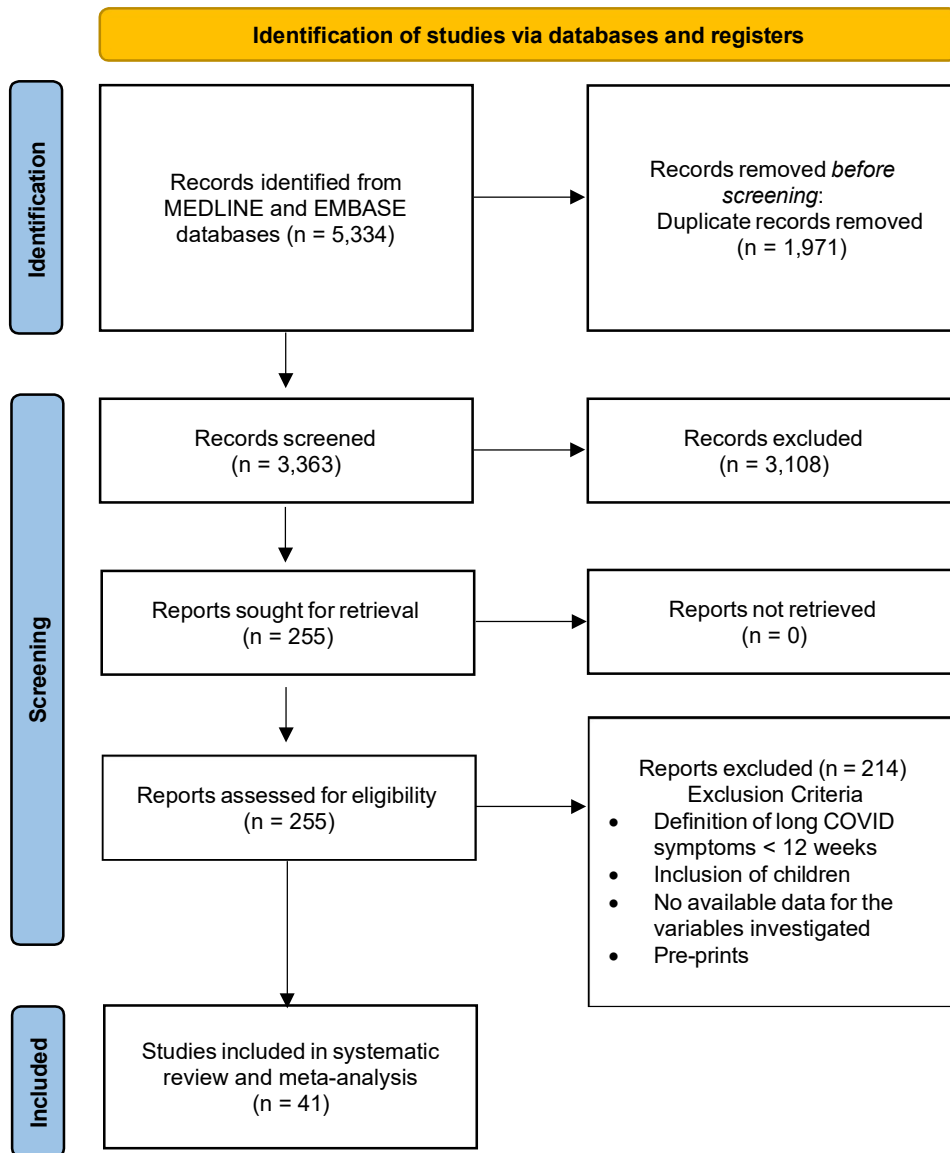

**eFigure 2.** Funnel plots assessing publication bias for each group meta-analysis: A) Sex, B) Age, C) Obesity, D) Smoking, E) Asthma, F) COPD, G) DM, H) CKD, I) IHD, J) Immunosuppression, K) Anxiety/Depression, L) Hospitalisation, M) ICU admission, N) Vaccination status

A) Female Sex

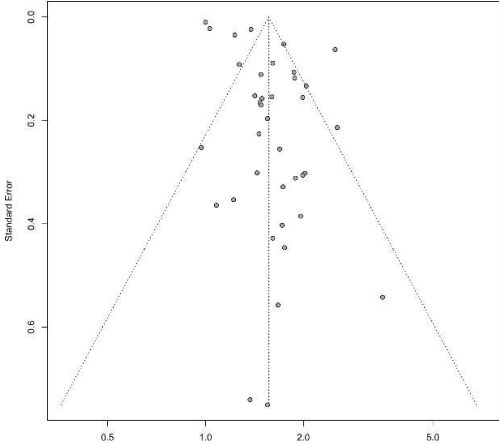

B) Age

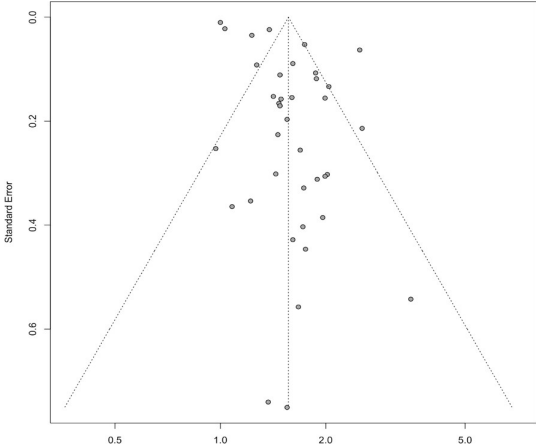

C) Obesity

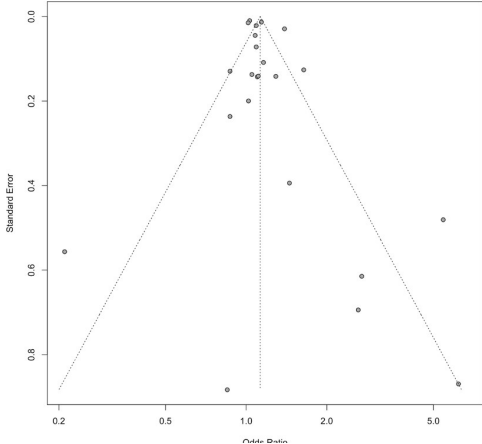

D) Smoking

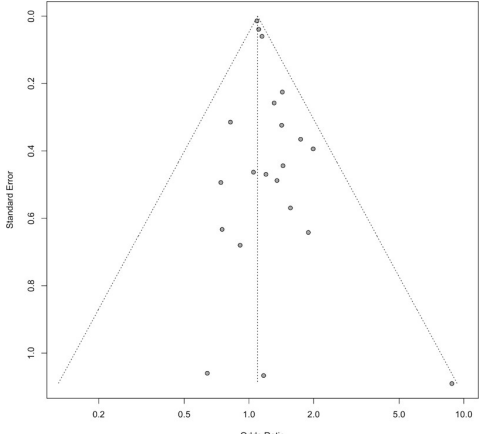

E) Asthma

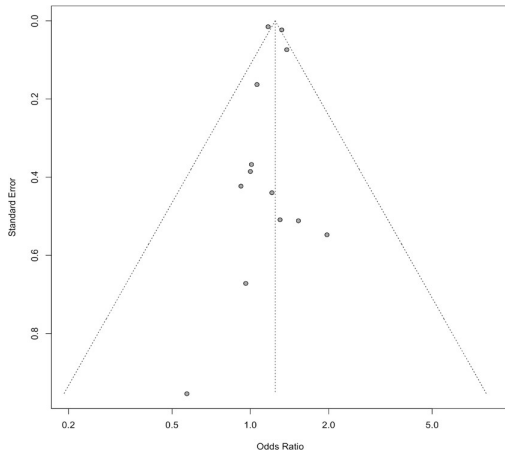

F) COPD

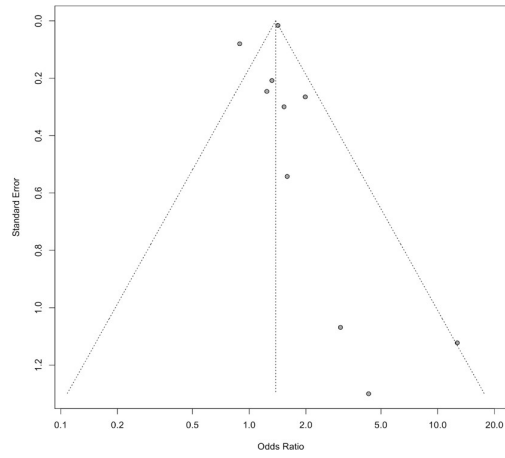

G) DM

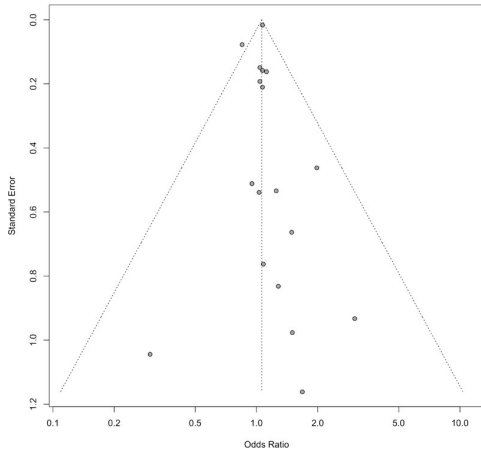

H) CKD

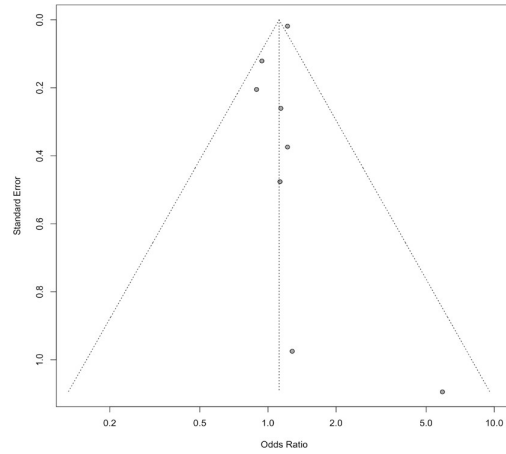

I) IHD

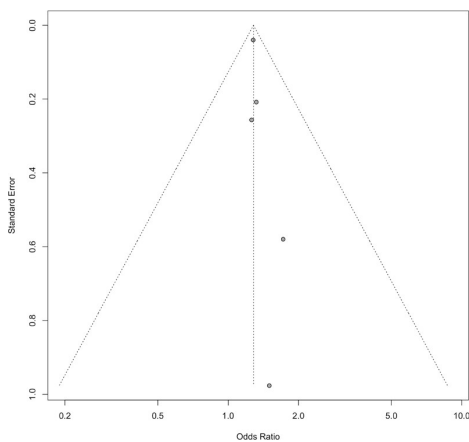

J) Immunosuppression

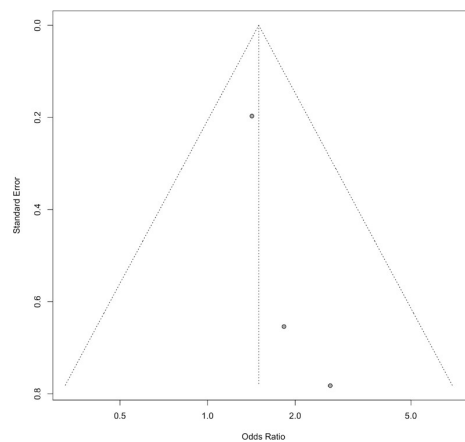



K) Anxiety/Depression

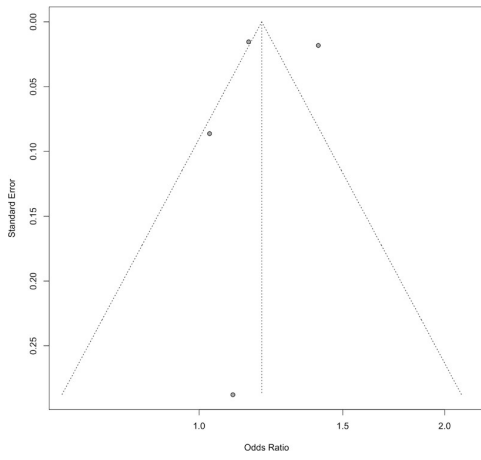

L) Hospitalisation

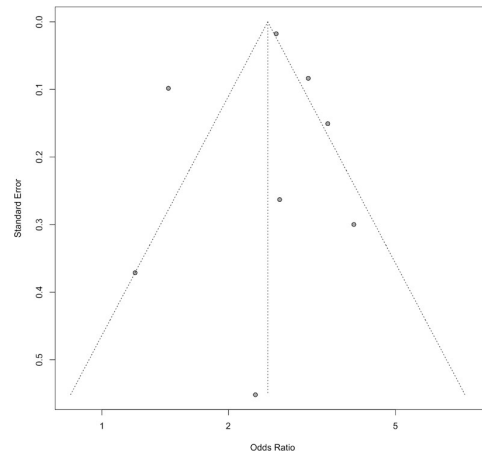

M) ICU admission

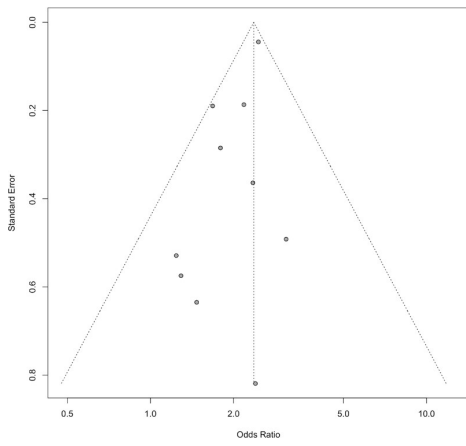

N) Vaccination status

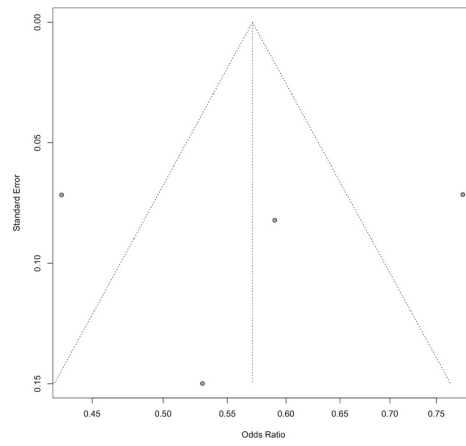

**eFigure 3.** Subgroup analysis of studies investigating the correlation of female sex and development of post-COVID-19 condition according to study population

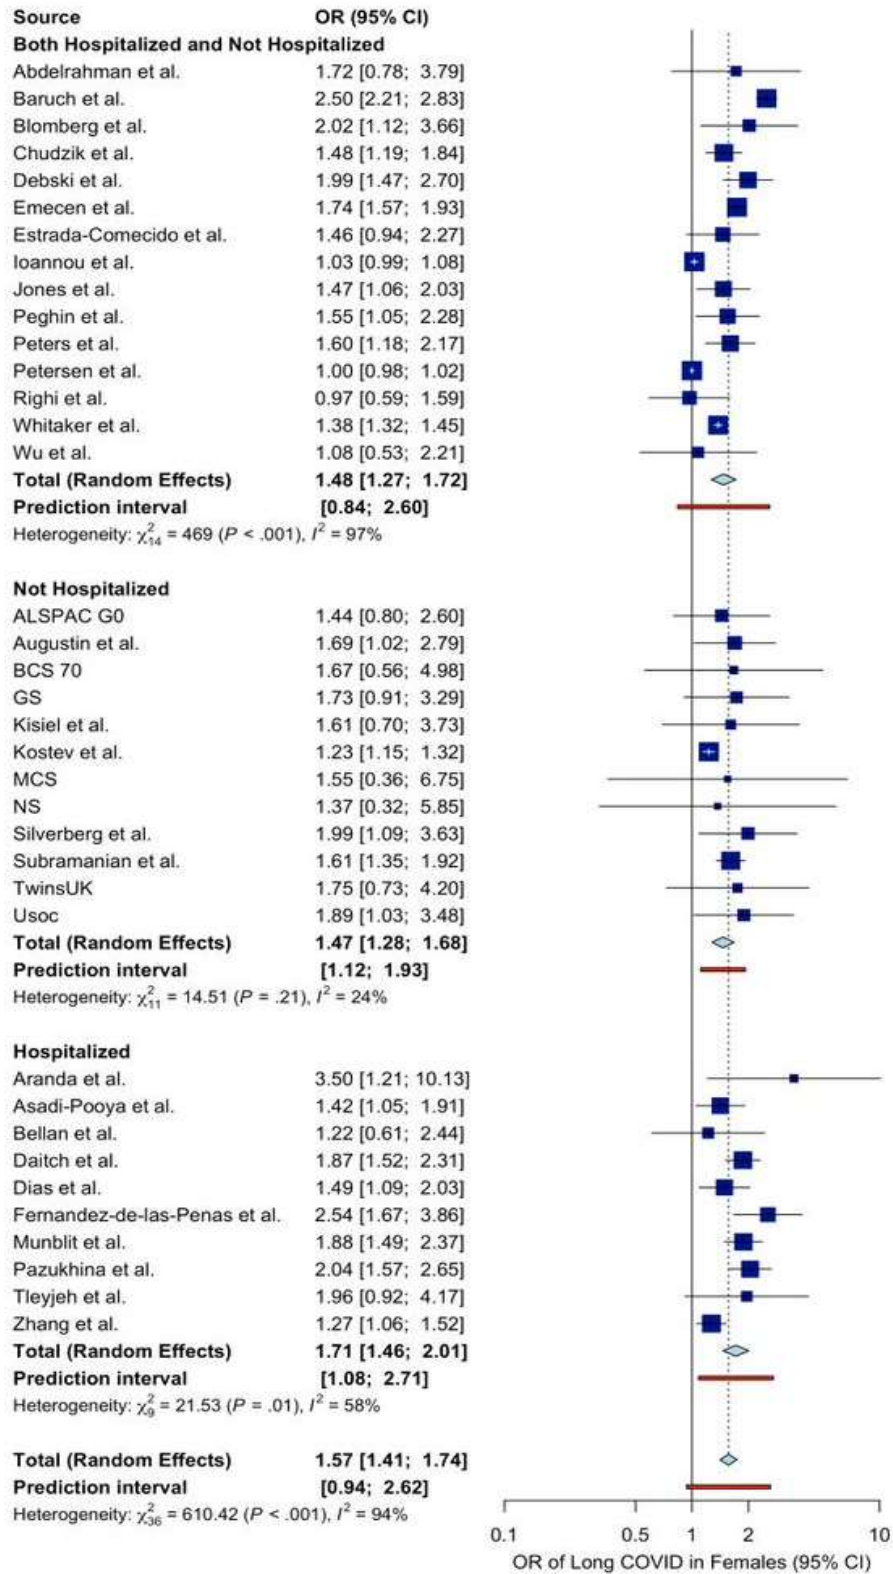

**eFigure 4.** Subgroup analysis of studies investigating the correlation of female sex and development of post-COVID-19 condition according to study quality (as per the Newcastle-Ottawa Scale)

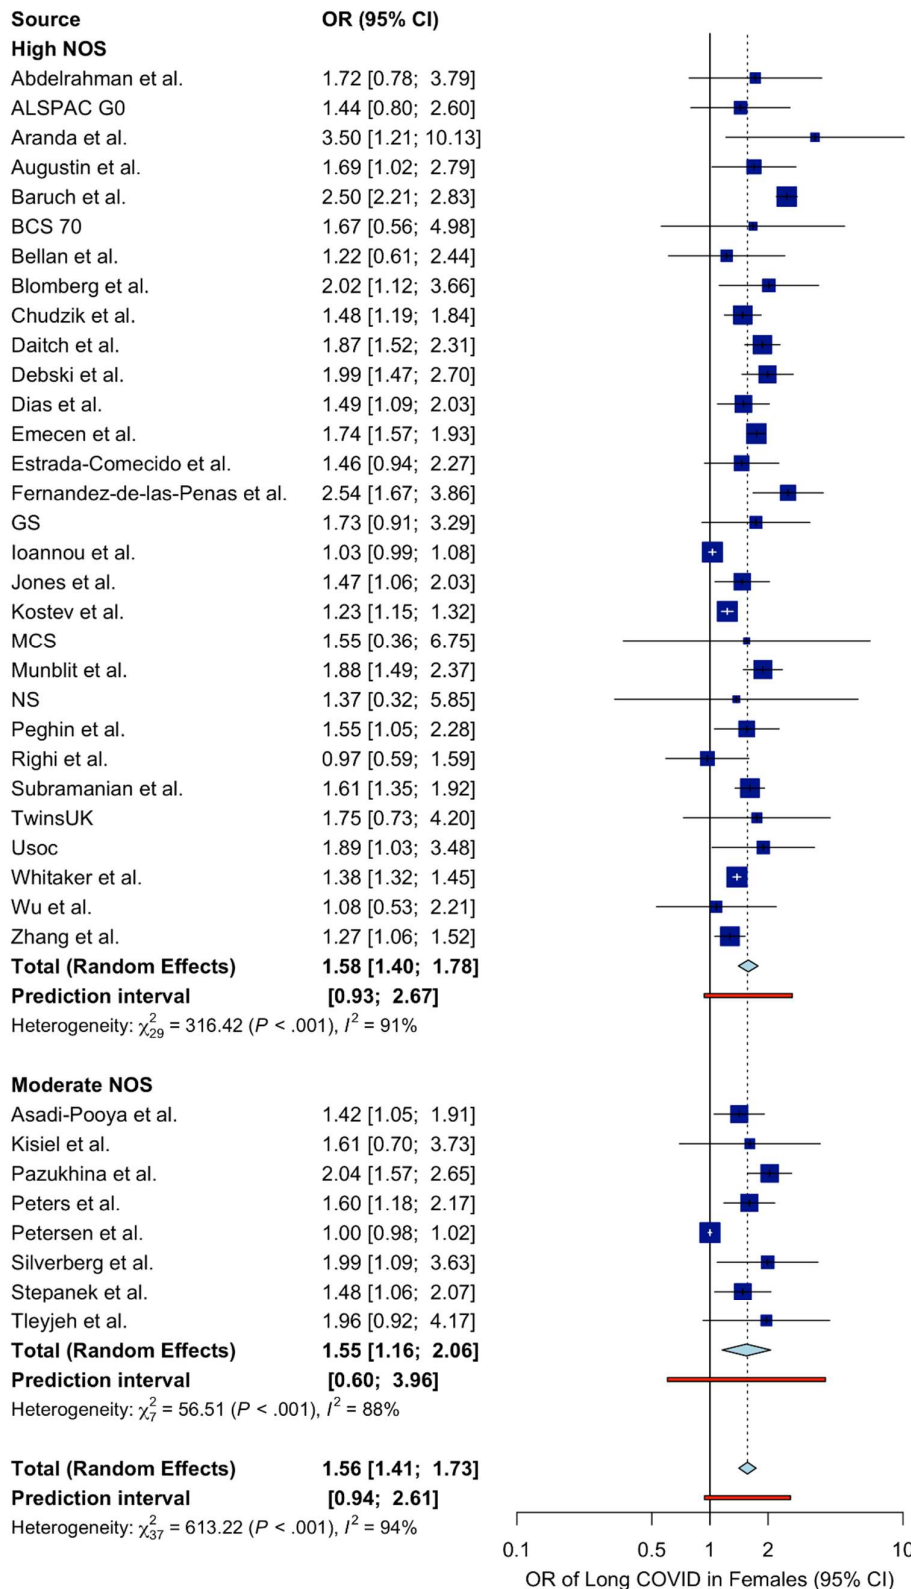

**eFigure 5.** Subgroup analysis of studies investigating the correlation of age and development of post-COVID-19 condition according to study size

| Source                                                             | OR (95% CI)              |
|--------------------------------------------------------------------|--------------------------|
| <b>Fewer than 1000 Patients</b>                                    |                          |
| Emecen et al. 45-54                                                | 1.41 [1.16; 1.71]        |
| Emecen et al. 55-64                                                | 1.34 [1.07; 1.68]        |
| Silverberg et al. 50-60                                            | 0.95 [0.50; 1.81]        |
| Emecen et al. 75                                                   | 0.90 [0.61; 1.33]        |
| Silverberg et al. >70                                              | 0.69 [0.13; 3.66]        |
| <b>Total (Random Effects)</b>                                      | <b>1.24 [1.03; 1.49]</b> |
| <b>Prediction interval</b>                                         | <b>[0.78; 1.95]</b>      |
| Heterogeneity: $\chi^2_4 = 5.6$ ( $P = .23$ ), $I^2 = 29\%$        |                          |
| <b>More than 1000 Patients</b>                                     |                          |
| Ioannou et al. 50-69                                               | 1.25 [1.19; 1.31]        |
| Kostev et al. 46-60                                                | 2.10 [1.81; 2.44]        |
| Subramanian et al. 40-49                                           | 0.98 [0.95; 1.01]        |
| Subramanian et al. 50-59                                           | 0.94 [0.91; 0.97]        |
| Subramanian et al. 60-69                                           | 0.91 [0.87; 0.95]        |
| Ioannou et al. 70-74                                               | 1.28 [1.22; 1.34]        |
| Ioannou et al. 75-79                                               | 1.32 [1.24; 1.41]        |
| Ioannou et al. 80-84                                               | 1.38 [1.28; 1.49]        |
| Ioannou et al. 85-89                                               | 1.26 [1.15; 1.38]        |
| Ioannou et al. >90                                                 | 1.21 [1.09; 1.34]        |
| Kostev et al. >70                                                  | 1.54 [1.23; 1.93]        |
| Subramanian et al. >70                                             | 0.94 [0.89; 0.99]        |
| <b>Total (Random Effects)</b>                                      | <b>1.21 [1.09; 1.34]</b> |
| <b>Prediction interval</b>                                         | <b>[0.81; 1.81]</b>      |
| Heterogeneity: $\chi^2_{11} = 455.09$ ( $P < .001$ ), $I^2 = 98\%$ |                          |
| <b>Total (Random Effects)</b>                                      | <b>1.21 [1.10; 1.32]</b> |
| <b>Prediction interval</b>                                         | <b>[0.82; 1.77]</b>      |
| Heterogeneity: $\chi^2_{16} = 468.41$ ( $P < .001$ ), $I^2 = 97\%$ |                          |

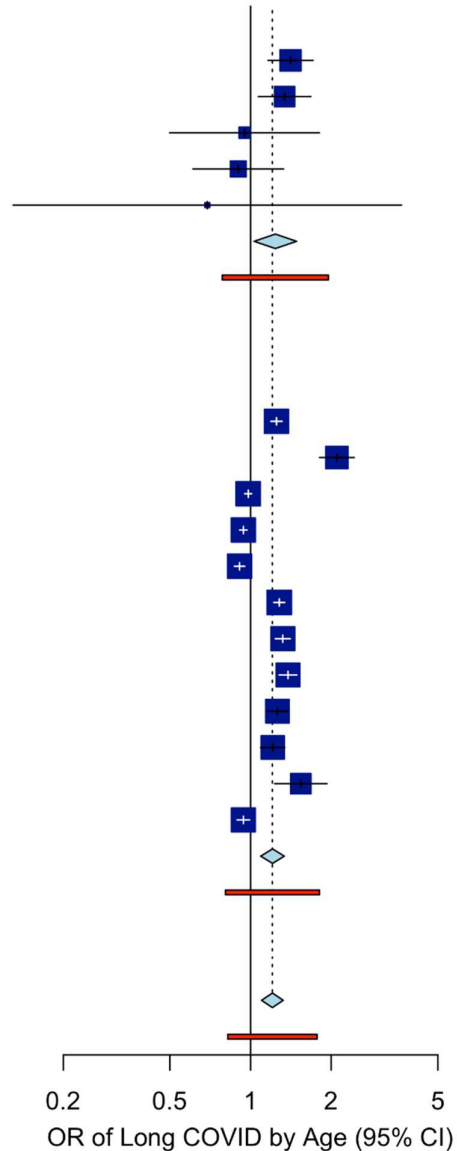

**eFigure 6.** Meta-regression analysis bubble plot of studies investigating age as risk factor for post-COVID-19 condition

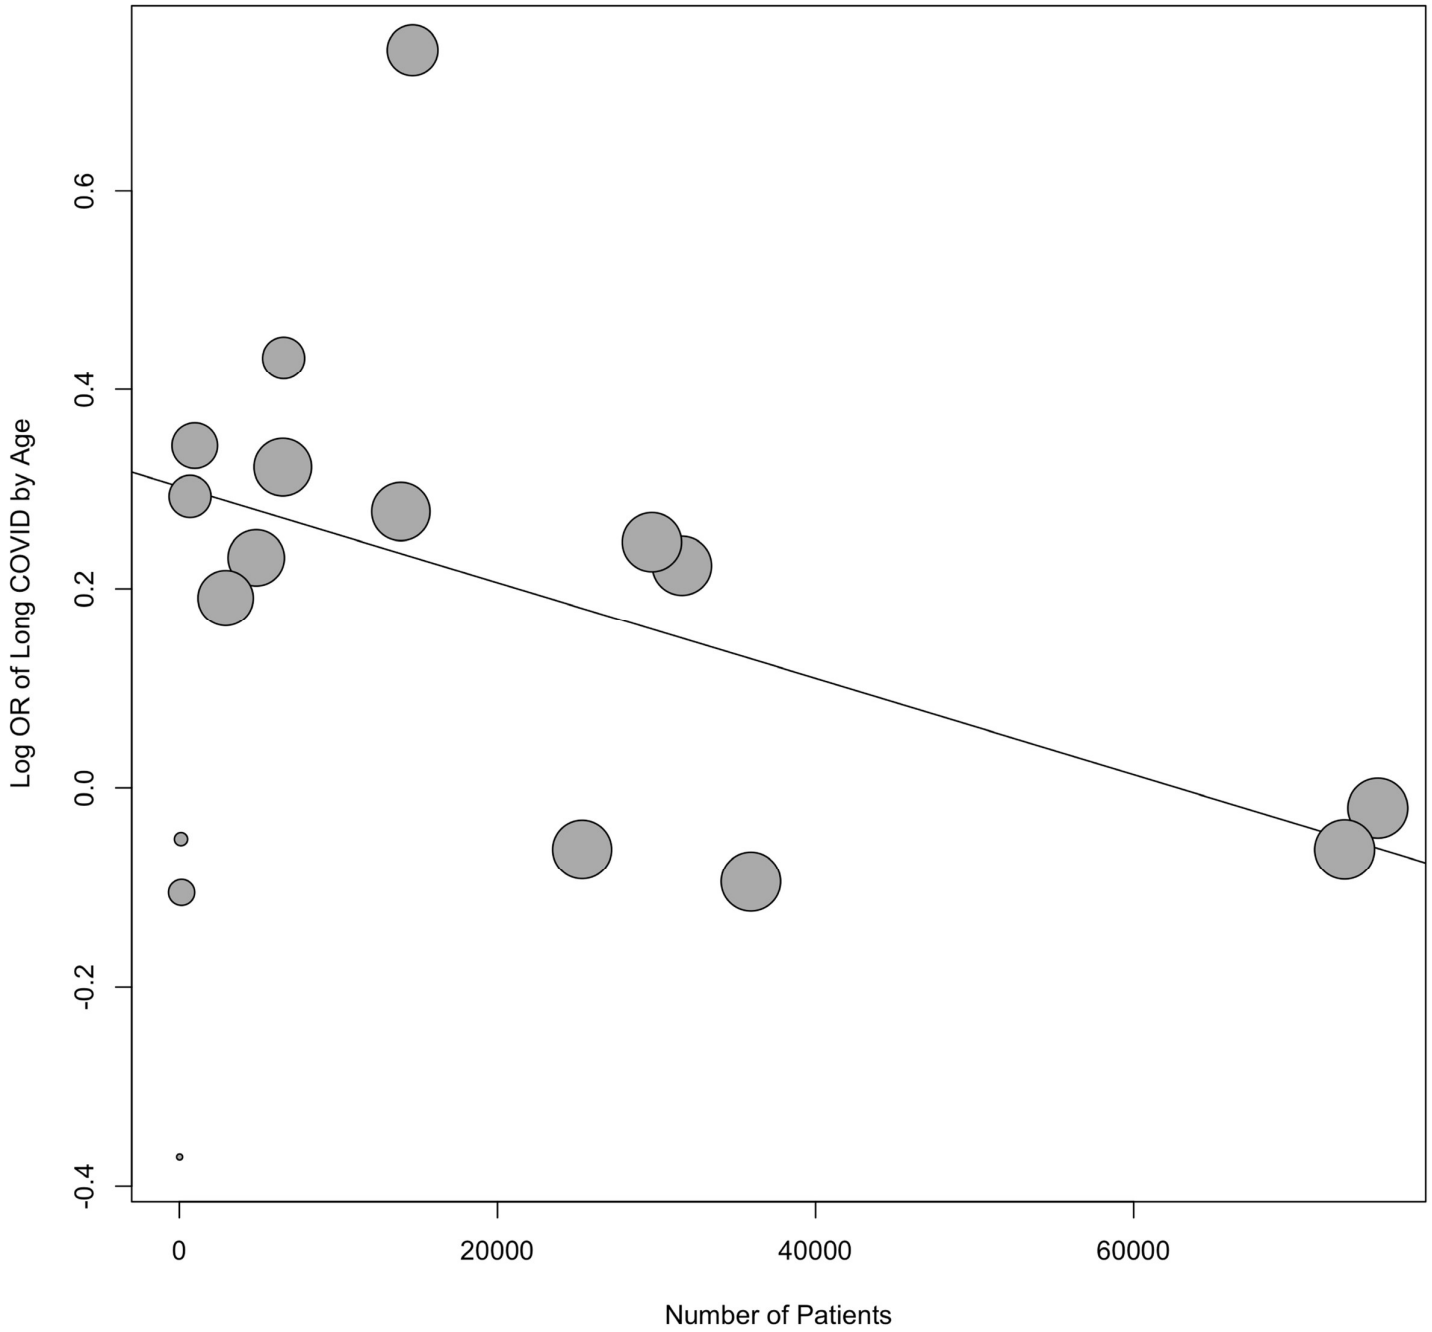

**eFigure 7.** Subgroup analysis of studies investigating the correlation of age and development of post-COVID-19 condition according to study population

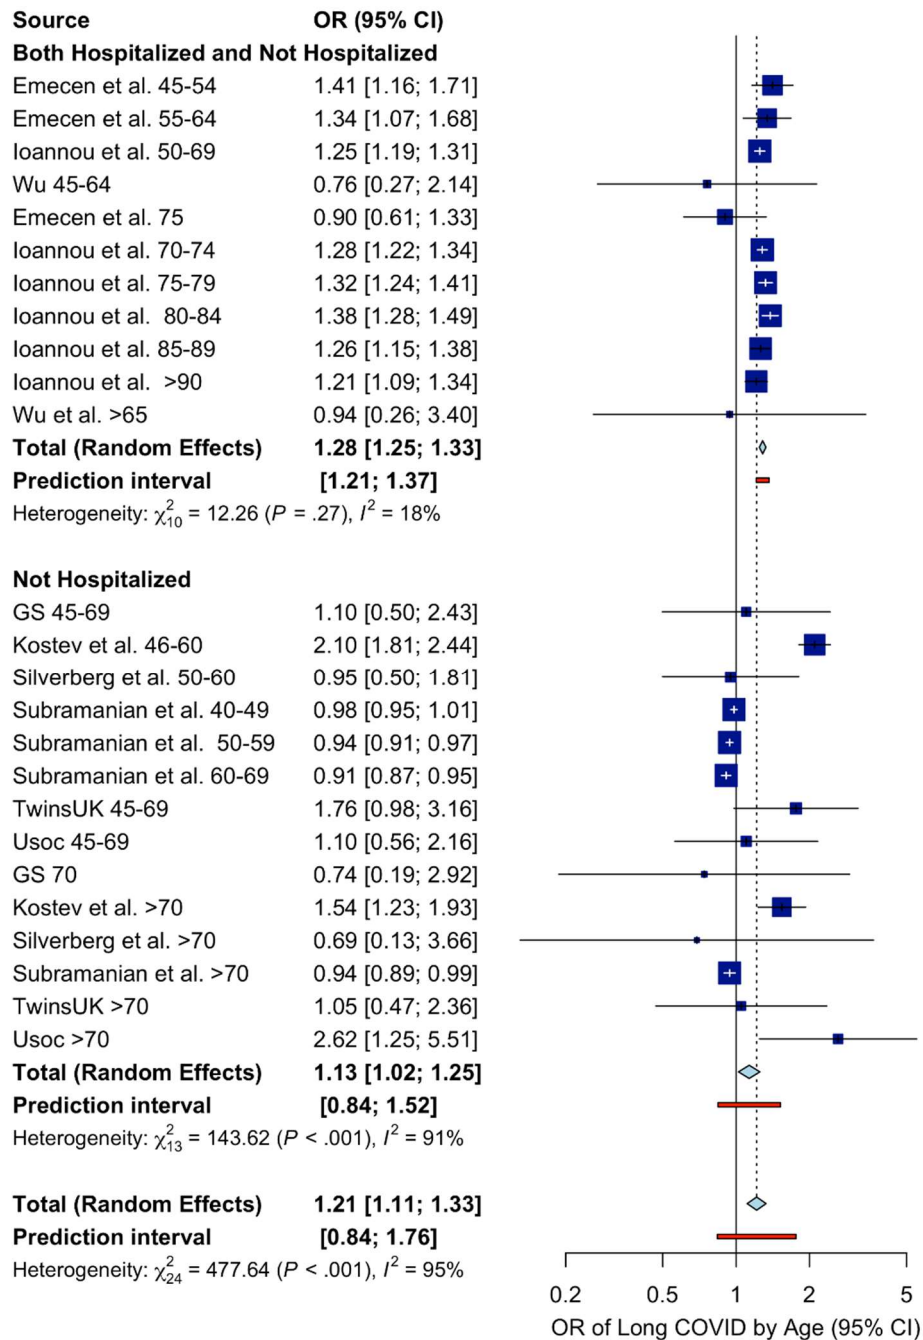

**eFigure 8.** Subgroup analysis of studies investigating the correlation of age and development of post-COVID-19 condition according to study quality (as per the Newcastle-Ottawa Scale)

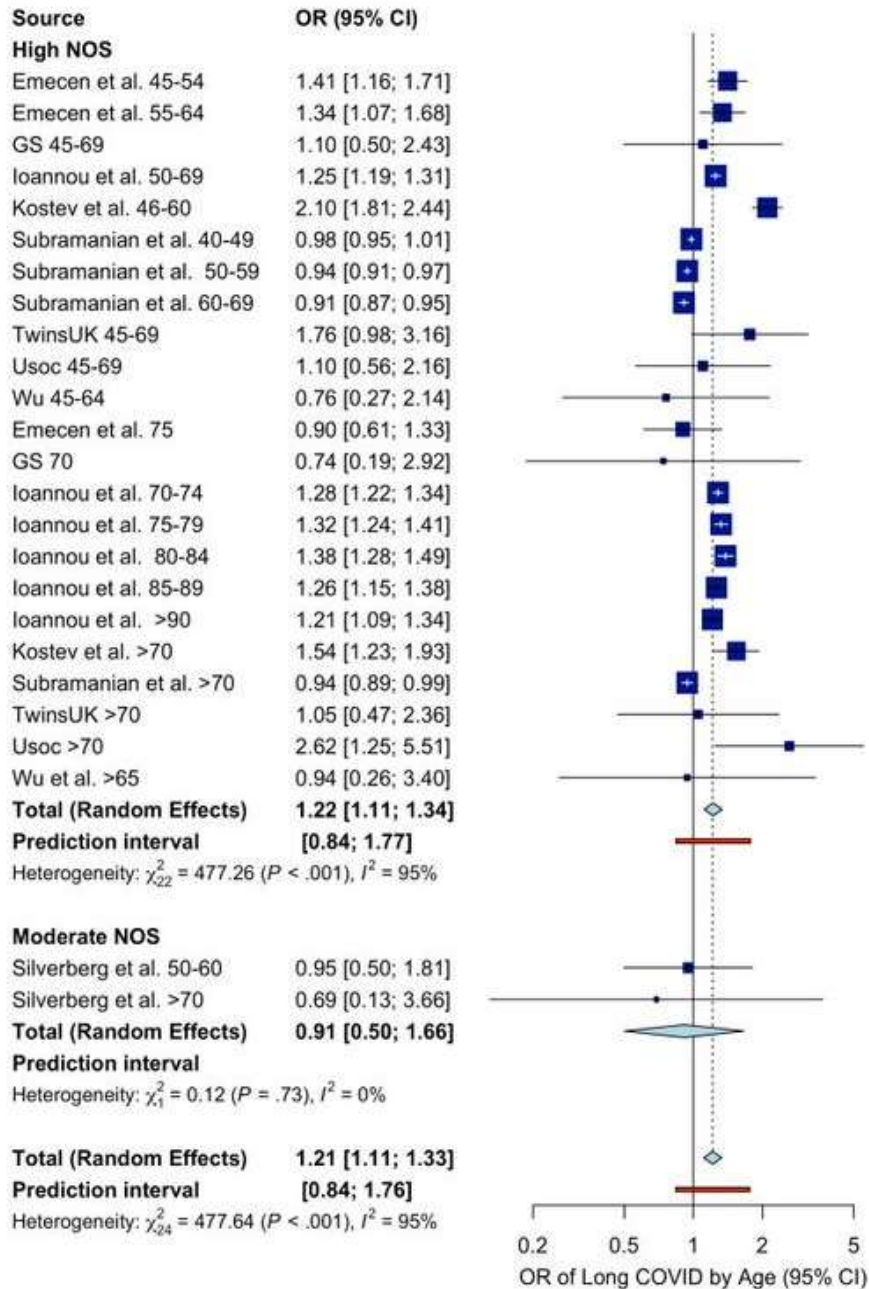

**Figure 9.** Forest plot showing the effect of BMI on post-COVID-19 condition. Individuals with obesity have an increased risk of developing post-COVID-19 condition.

| Source                                                             | OR (95% CI)              |
|--------------------------------------------------------------------|--------------------------|
| Bellan et al.                                                      | 2.70 [0.81; 9.00]        |
| Daitch et al.                                                      | 1.64 [1.28; 2.10]        |
| Dias et al.                                                        | 1.03 [1.01; 1.05]        |
| Fernandez-de-las-Penas et al.                                      | 0.85 [0.15; 4.80]        |
| Ioannou et al.                                                     | 1.09 [1.05; 1.14]        |
| Jones et al.                                                       | 1.05 [0.80; 1.37]        |
| Kisiel et al.                                                      | 2.62 [0.67; 10.21]       |
| Kostev et al.                                                      | 1.09 [0.95; 1.26]        |
| Menezes et al.                                                     | 6.20 [1.13; 34.06]       |
| Munblit et al.                                                     | 1.29 [0.98; 1.70]        |
| Peters et al.                                                      | 1.10 [0.83; 1.46]        |
| Petersen et al.                                                    | 1.08 [0.99; 1.18]        |
| Stepanek et al.                                                    | 1.02 [0.99; 1.05]        |
| Subramanian et al.                                                 | 1.14 [1.11; 1.17]        |
| Whitaker et al.                                                    | 1.39 [1.31; 1.47]        |
| Wu et al.                                                          | 5.44 [2.12; 13.96]       |
| <b>Total (Random Effects)</b>                                      | <b>1.15 [1.08; 1.23]</b> |
| <b>Prediction interval</b>                                         | <b>[0.94; 1.42]</b>      |
| Heterogeneity: $\chi^2_{15} = 161.91$ ( $P < .001$ ), $I^2 = 91\%$ |                          |

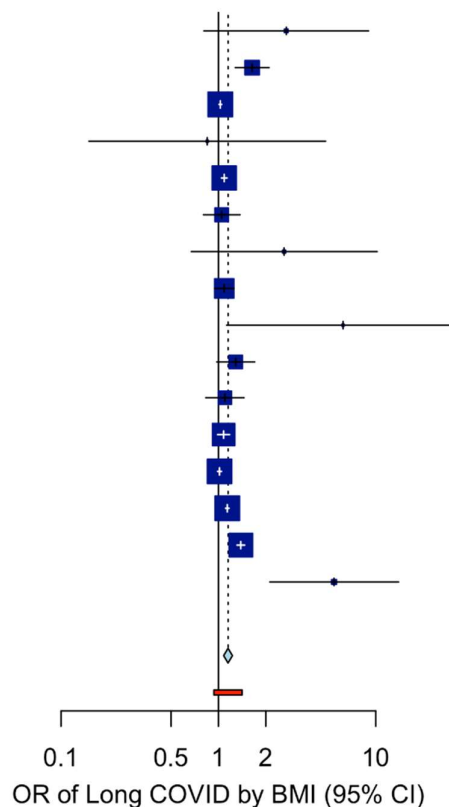



**eFigure 10.** Subgroup analysis of studies investigating the correlation of obesity and development of post-COVID-19 condition according to study population

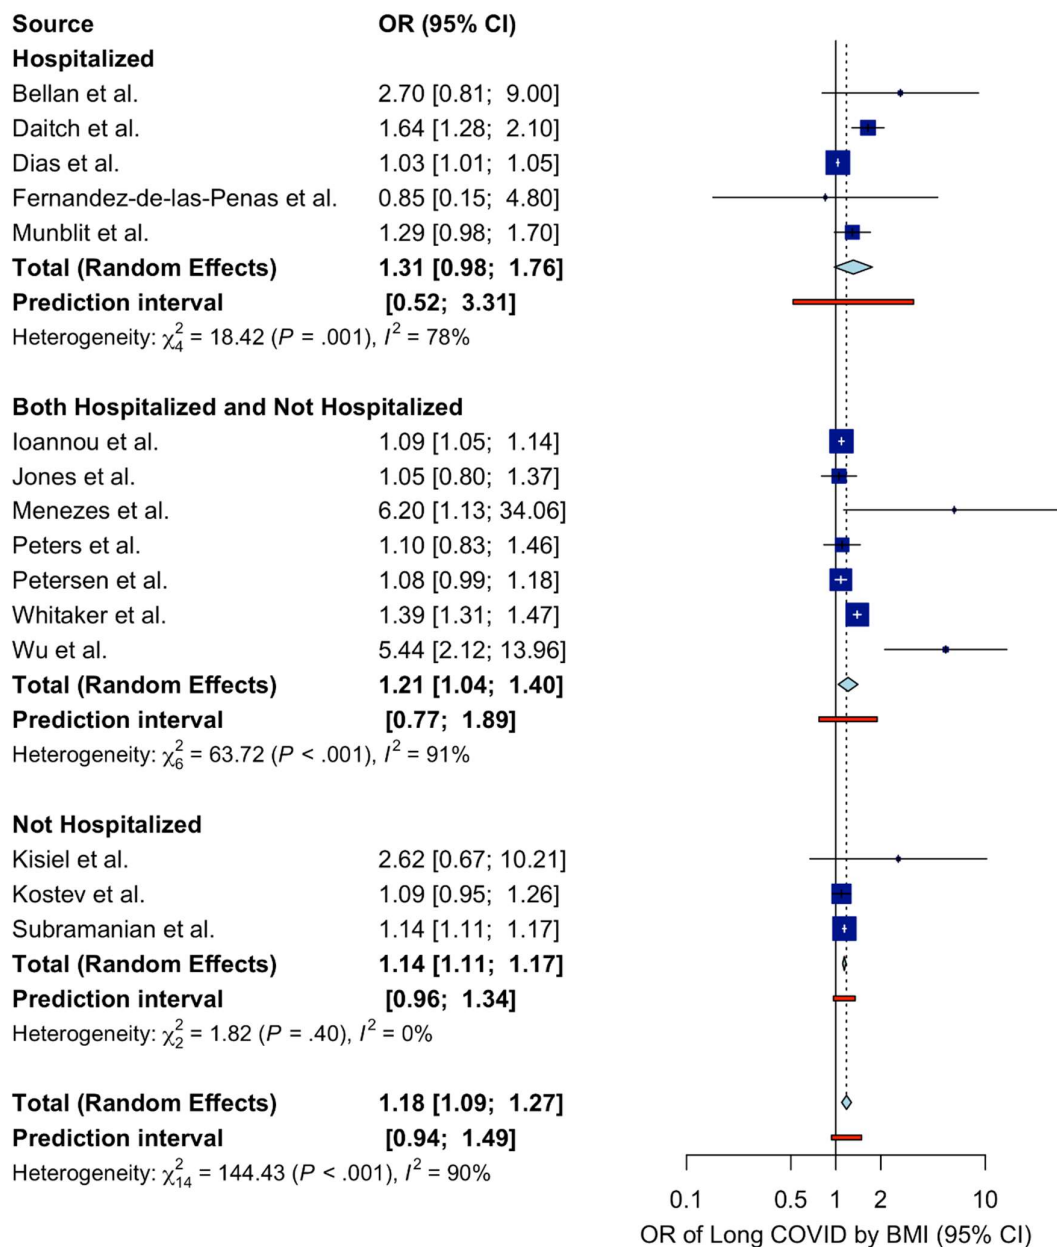

**eFigure 11.** Subgroup analysis of studies investigating the correlation of obesity and development of post-COVID-19 condition according to study quality (as per the Newcastle-Ottawa Scale)

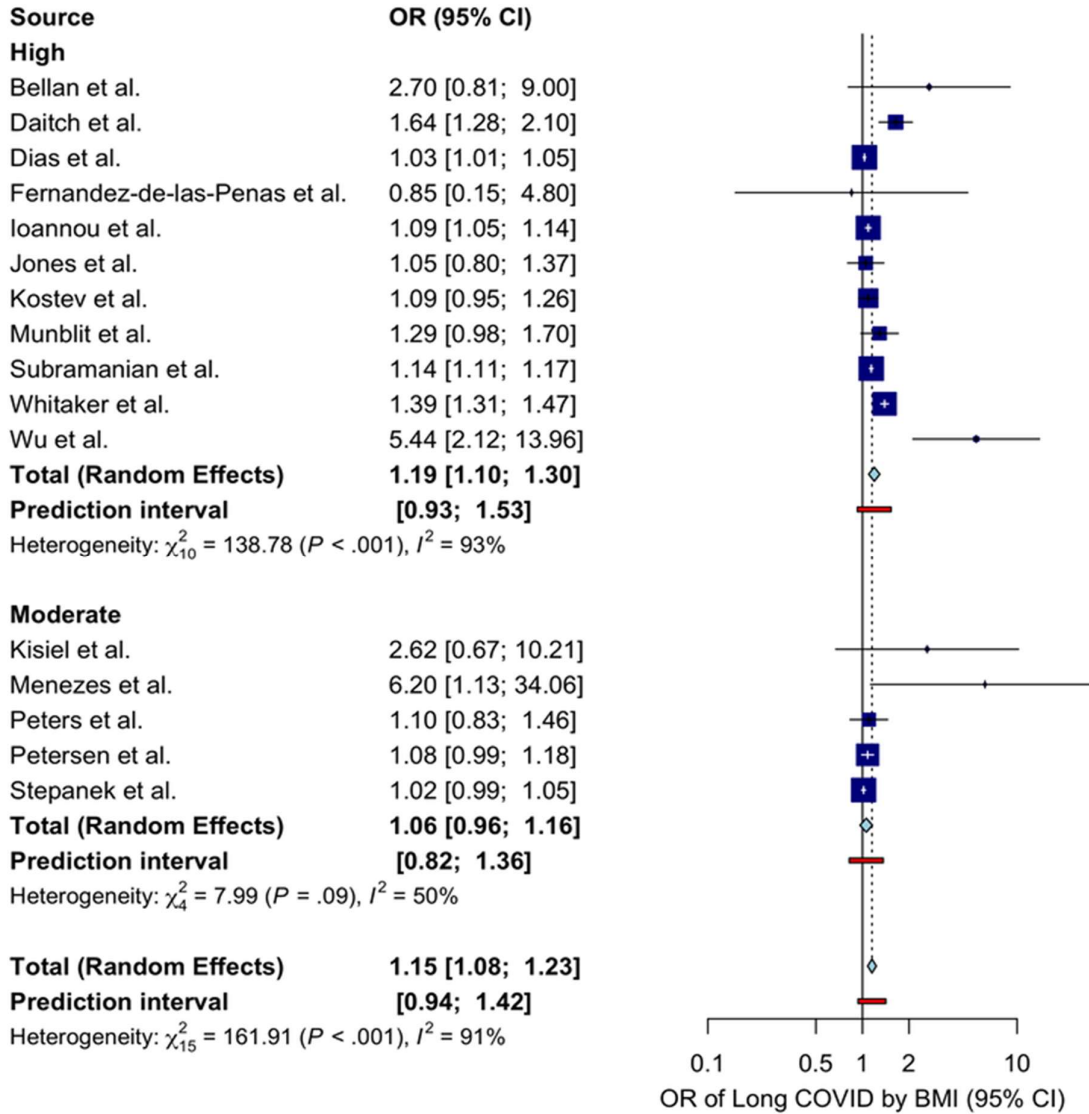

**eFigure 12.** Subgroup analysis of studies investigating the correlation of smoking and development of post-COVID-19 condition according to study quality (as per the Newcastle-Ottawa Scale)

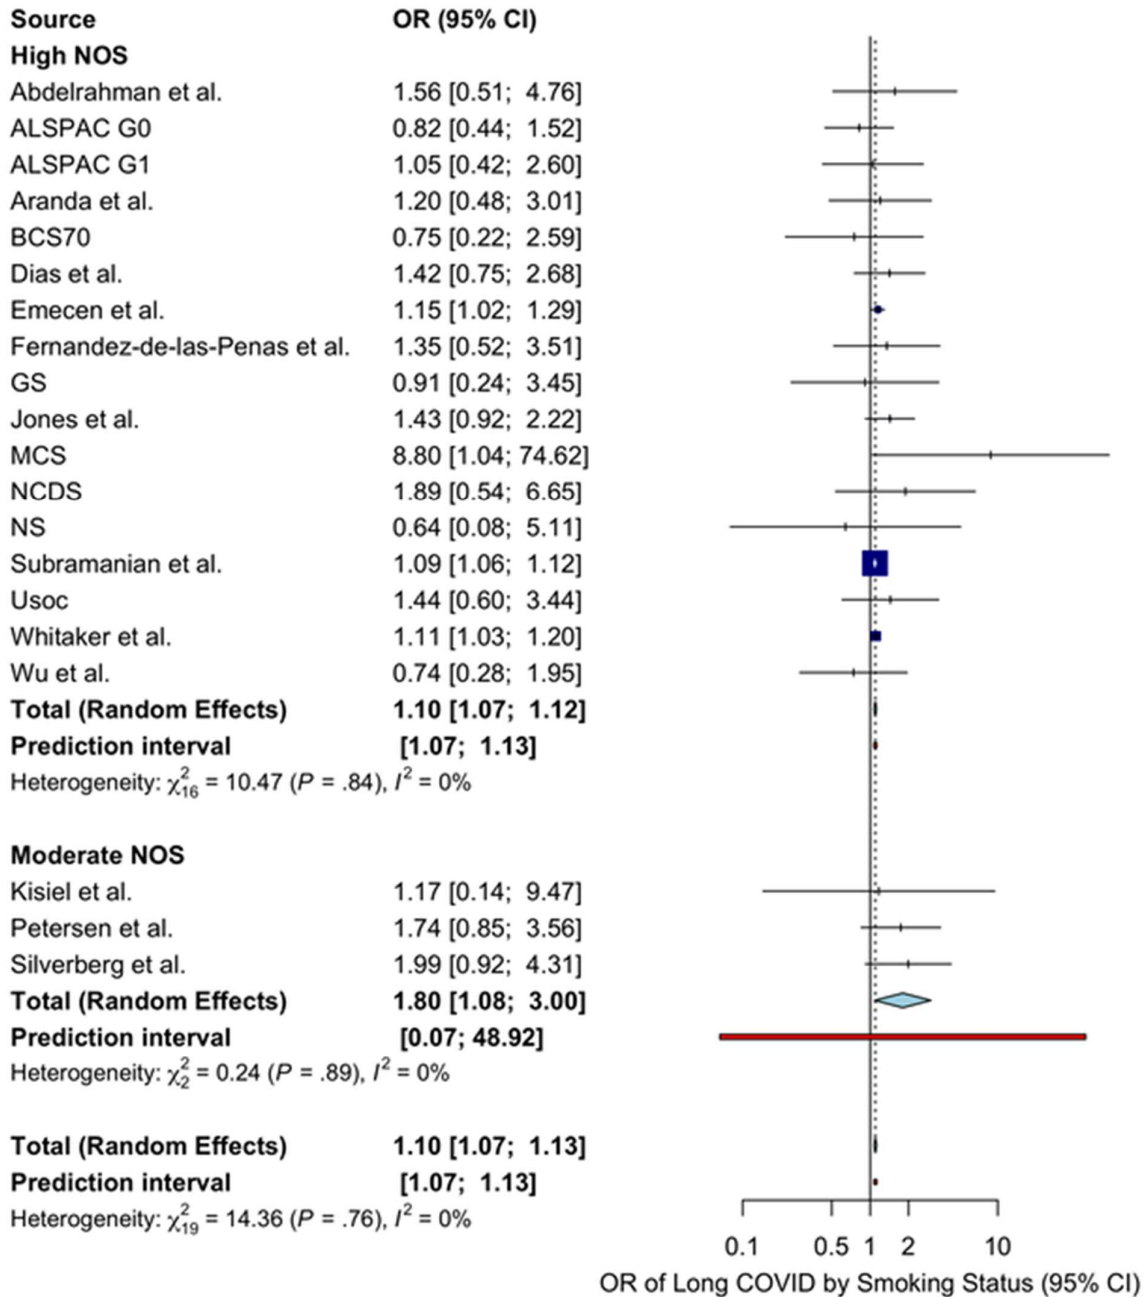

**eFigure 13. Forest plot showing the effect of asthma on post-COVID-19 condition.** Individuals with asthma have an increased risk of developing post-COVID-19 condition.

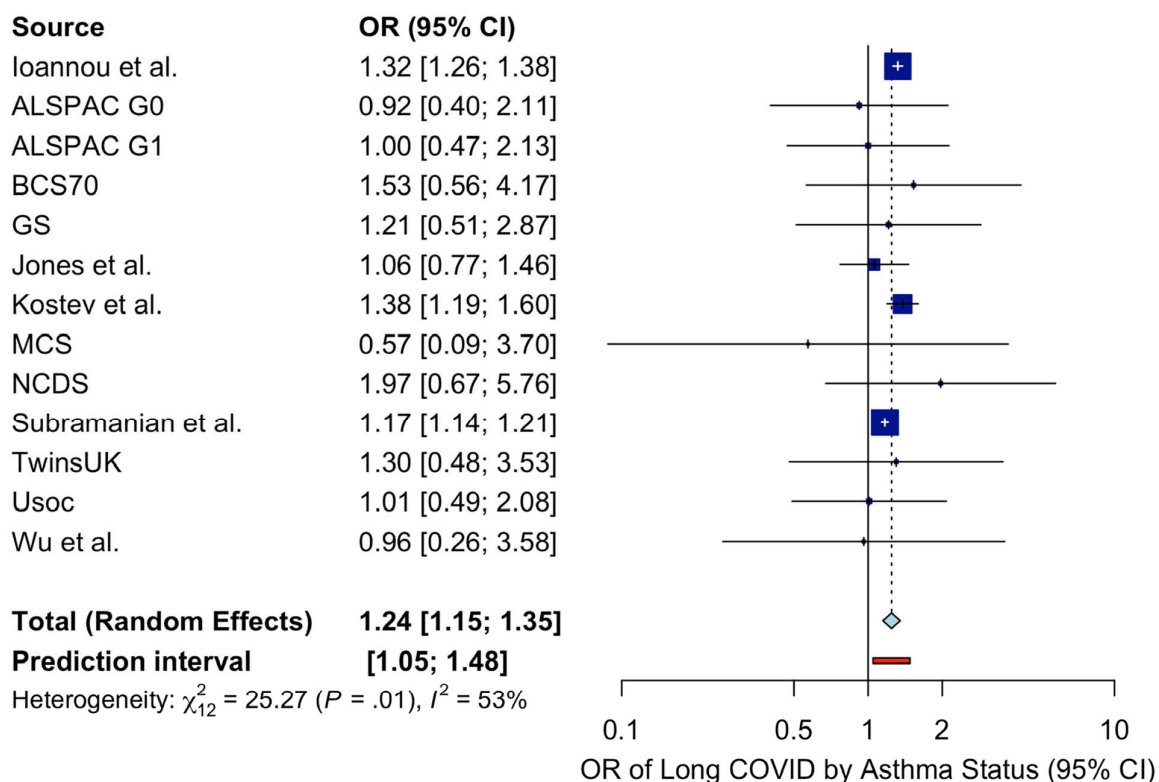

**eFigure 14.** Subgroup analysis of studies investigating the correlation of asthma and development of post-COVID-19 condition according to study size

| Source                                                         | OR (95% CI)              |
|----------------------------------------------------------------|--------------------------|
| <b>More than 1000 Patients</b>                                 |                          |
| Ioannou et al.                                                 | 1.32 [1.26; 1.38]        |
| Kostev et al.                                                  | 1.38 [1.19; 1.60]        |
| Subramanian et al.                                             | 1.17 [1.14; 1.21]        |
| <b>Total (Random Effects)</b>                                  | <b>1.27 [1.15; 1.41]</b> |
| <b>Prediction interval</b>                                     | <b>[0.36; 4.45]</b>      |
| Heterogeneity: $\chi^2_2 = 21.86$ ( $P < .001$ ), $I^2 = 91\%$ |                          |

|                                                             |                          |
|-------------------------------------------------------------|--------------------------|
| <b>Fewer than 1000 Patients</b>                             |                          |
| ALSPAC G0                                                   | 0.92 [0.40; 2.11]        |
| ALSPAC G1                                                   | 1.00 [0.47; 2.13]        |
| BCS70                                                       | 1.53 [0.56; 4.17]        |
| GS                                                          | 1.21 [0.51; 2.87]        |
| Jones et al.                                                | 1.06 [0.77; 1.46]        |
| MCS                                                         | 0.57 [0.09; 3.70]        |
| NCDS                                                        | 1.97 [0.67; 5.76]        |
| TwinsUK                                                     | 1.30 [0.48; 3.53]        |
| Usoc                                                        | 1.01 [0.49; 2.08]        |
| Wu et al.                                                   | 0.96 [0.26; 3.58]        |
| <b>Total (Random Effects)</b>                               | <b>1.10 [0.88; 1.37]</b> |
| <b>Prediction interval</b>                                  | <b>[0.84; 1.42]</b>      |
| Heterogeneity: $\chi^2_9 = 2.56$ ( $P = .98$ ), $I^2 = 0\%$ |                          |

|                                                                  |                          |
|------------------------------------------------------------------|--------------------------|
| <b>Total (Random Effects)</b>                                    | <b>1.24 [1.15; 1.35]</b> |
| <b>Prediction interval</b>                                       | <b>[1.05; 1.48]</b>      |
| Heterogeneity: $\chi^2_{12} = 25.27$ ( $P = .01$ ), $I^2 = 53\%$ |                          |

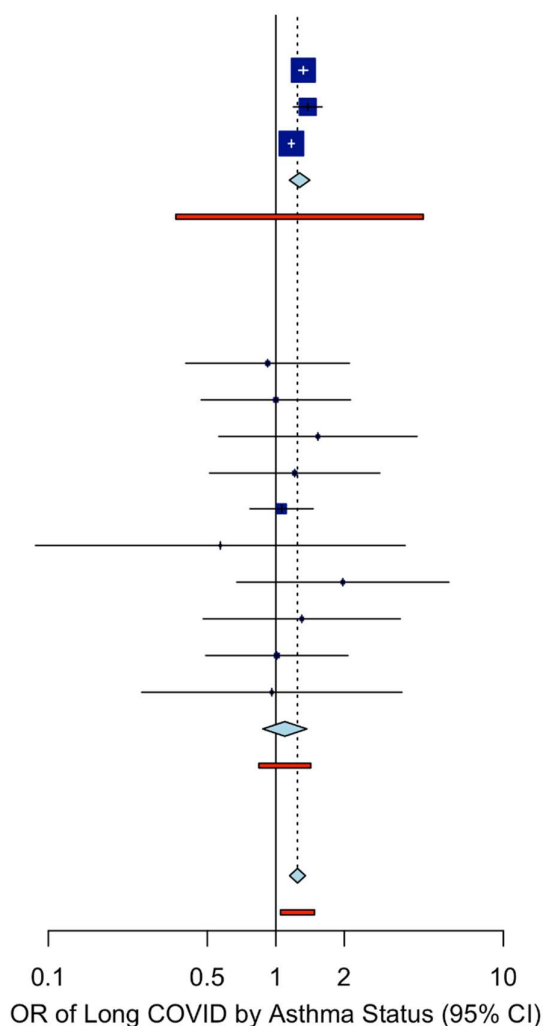

**eFigure 15.** Forest plot showing the effect of COPD on post-COVID-19 condition. Individuals with COPD have an increased risk of developing post-COVID-19 condition.

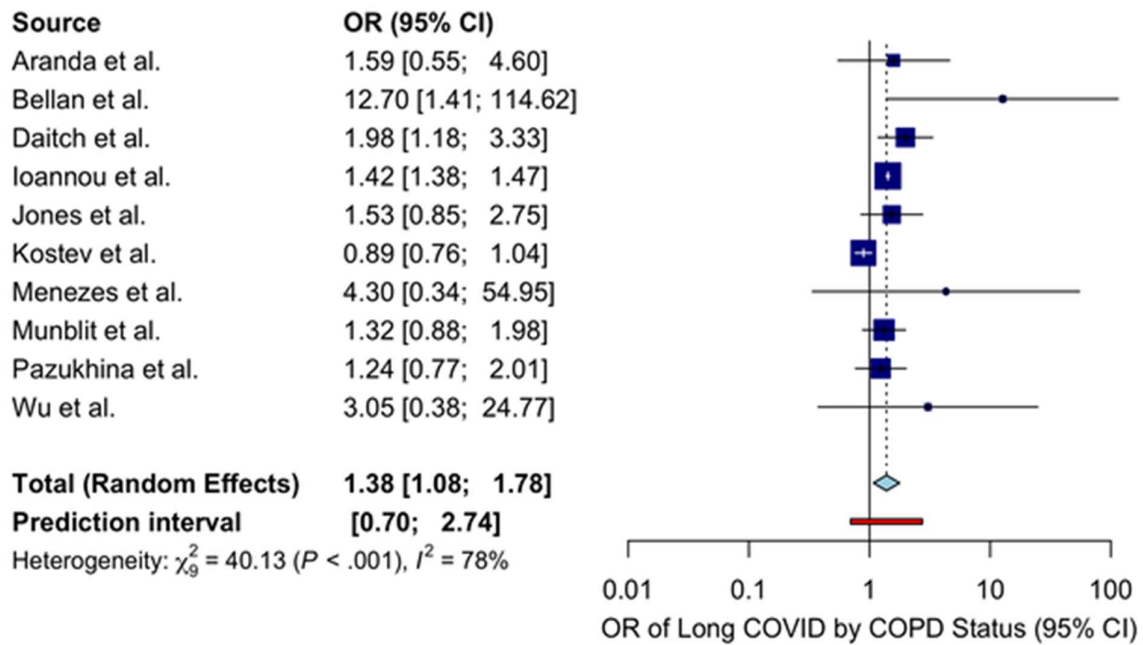

eFigure 16. Subgroup analysis of studies investigating the correlation of COPD and development of post-COVID-19 condition according to study quality (as per the Newcastle-Ottawa Scale)

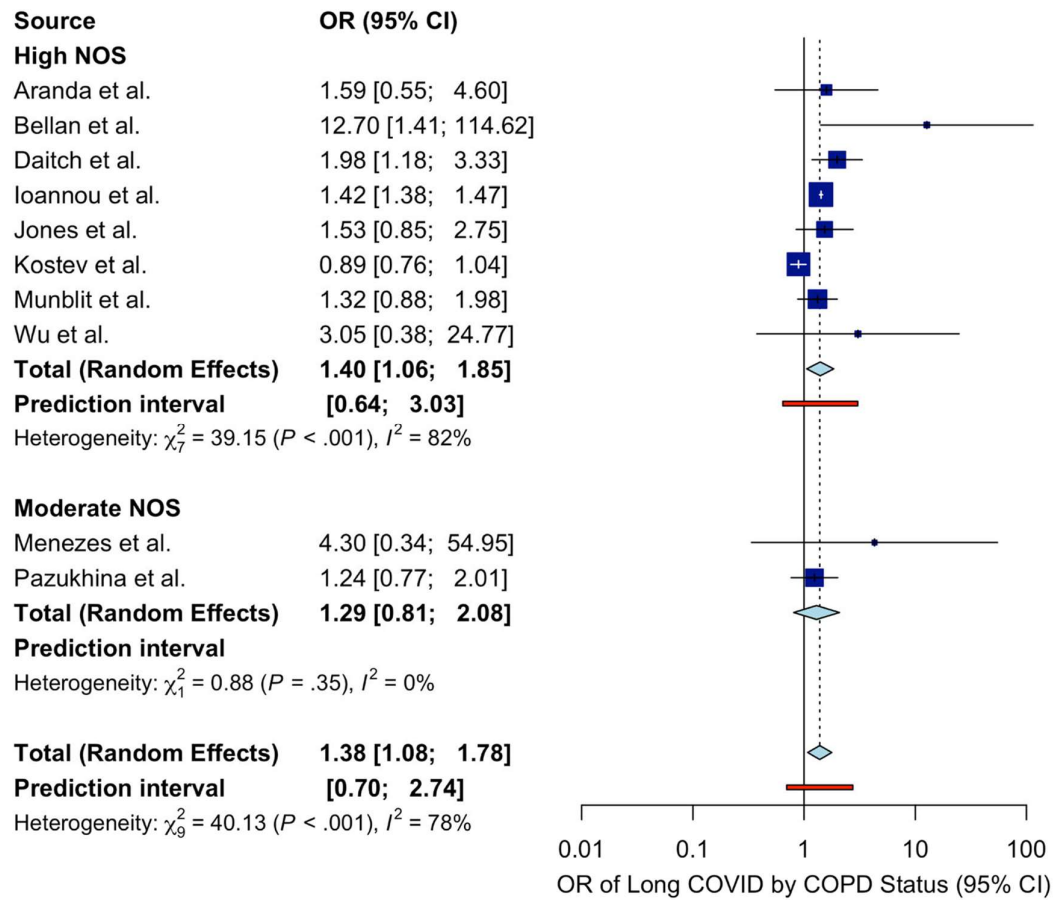

**eFigure 17.** Forest plot showing the effect of diabetes on post-COVID-19 condition. Individuals with diabetes have an increased risk of developing post-COVID-19 condition.

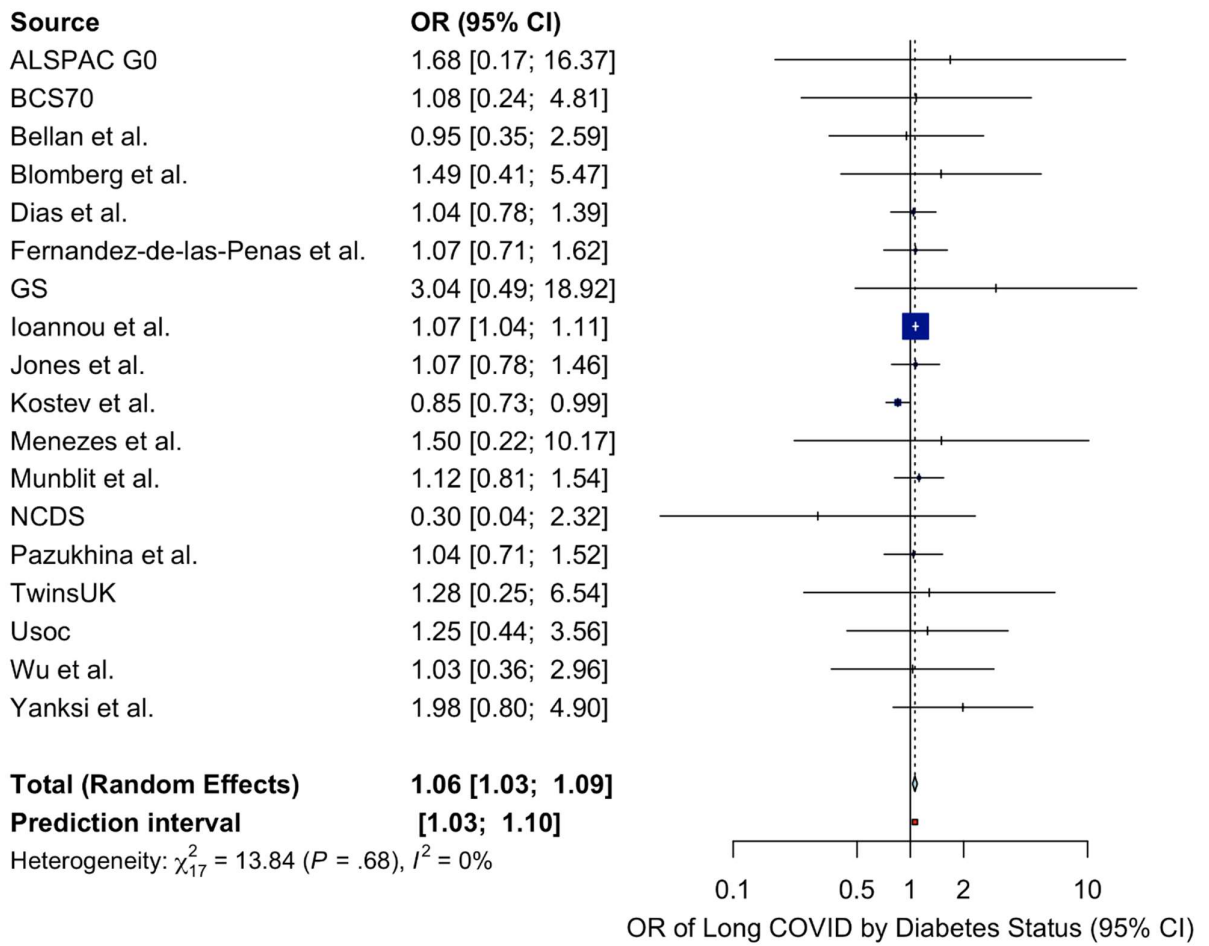



**eFigure 18.** Subgroup analysis of studies investigating the correlation of diabetes and development of post-COVID-19 condition according to study quality (as per the Newcastle-Ottawa Scale)

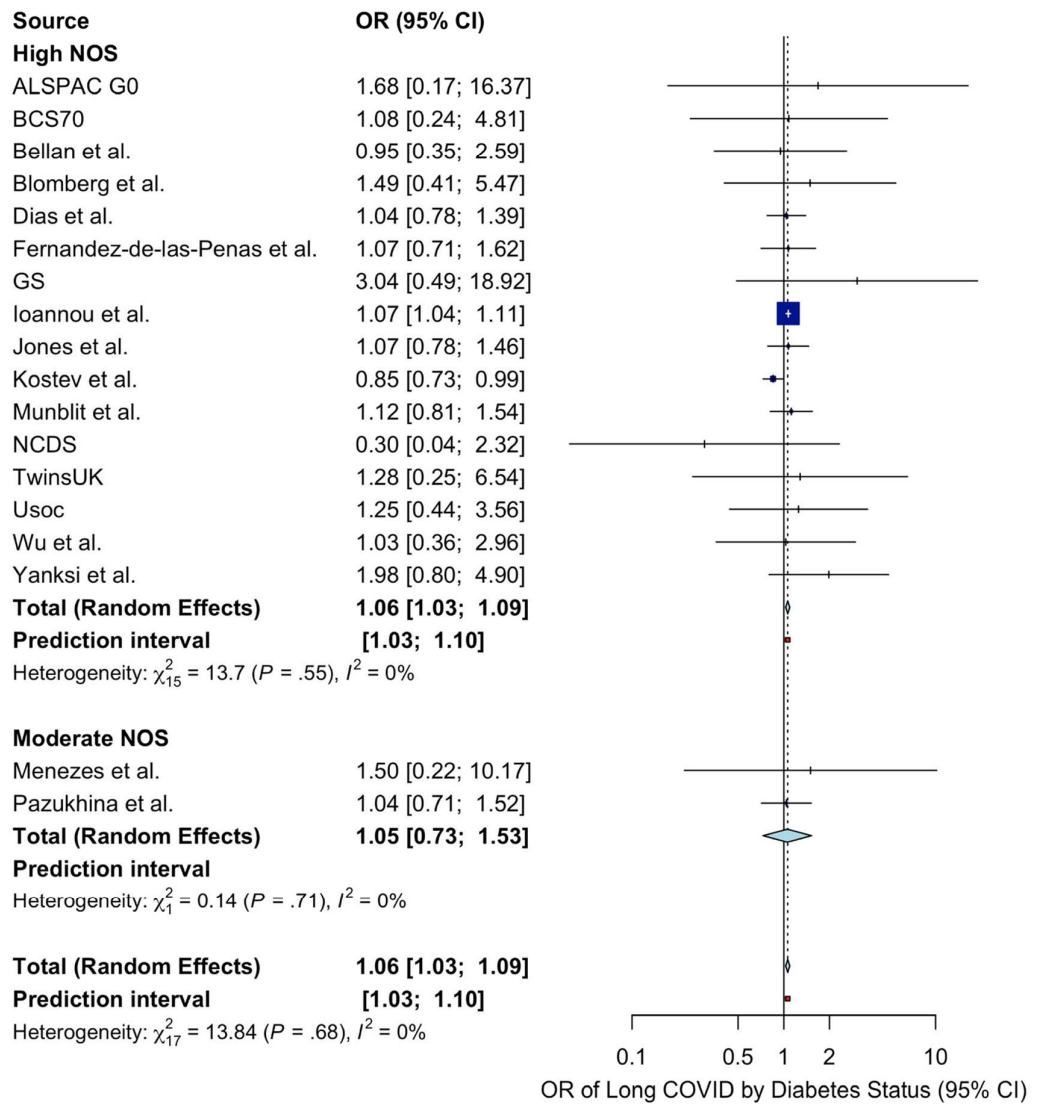

**eFigure 19.** Forest plot showing the effect of CKD on post-COVID-19 condition. CKD was not significantly associated with post-COVID-19 condition.

| Source                                                       | OR (95% CI)              |
|--------------------------------------------------------------|--------------------------|
| Bellan et al., 2021                                          | 5.90 [0.69; 50.40]       |
| Dias                                                         | 0.89 [0.60; 1.33]        |
| Ioannou                                                      | 1.22 [1.18; 1.27]        |
| Jones                                                        | 1.22 [0.59; 2.54]        |
| Kostev                                                       | 0.94 [0.74; 1.19]        |
| Munblit et al., 2021                                         | 1.14 [0.68; 1.90]        |
| Pazukhina                                                    | 1.13 [0.44; 2.87]        |
| Wu                                                           | 1.28 [0.19; 8.65]        |
| <b>Total (Random Effects)</b>                                | <b>1.12 [0.98; 1.28]</b> |
| <b>Prediction interval</b>                                   | <b>[0.85; 1.48]</b>      |
| Heterogeneity: $\chi^2_7 = 8.95$ ( $P = .26$ ), $I^2 = 22\%$ |                          |

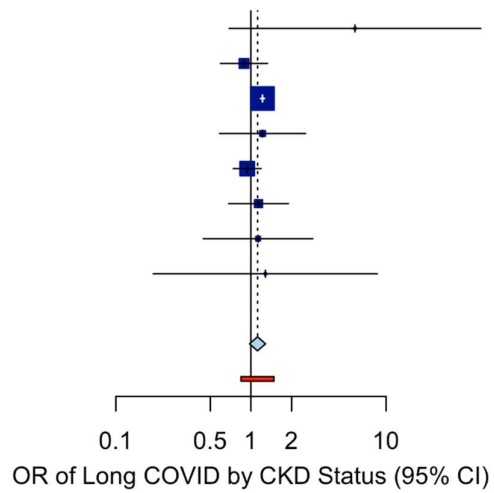

**eFigure 20.** Subgroup analysis of studies investigating the correlation of CKD and development of post-COVID-19 condition according to study quality (as per the Newcastle-Ottawa Scale)

| Source                                                       | OR (95% CI)              |
|--------------------------------------------------------------|--------------------------|
| <b>High NOS</b>                                              |                          |
| Bellan et al., 2021                                          | 5.90 [0.69; 50.40]       |
| Dias                                                         | 0.89 [0.60; 1.33]        |
| Ioannou                                                      | 1.22 [1.18; 1.27]        |
| Jones                                                        | 1.22 [0.59; 2.54]        |
| Kostev                                                       | 0.94 [0.74; 1.19]        |
| Munblit et al., 2021                                         | 1.14 [0.68; 1.90]        |
| Wu                                                           | 1.28 [0.19; 8.65]        |
| <b>Total (Random Effects)</b>                                | <b>1.11 [0.94; 1.30]</b> |
| <b>Prediction interval</b>                                   | <b>[0.77; 1.59]</b>      |
| Heterogeneity: $\chi^2_6 = 8.93$ ( $P = .18$ ), $I^2 = 33\%$ |                          |
| <b>Moderate NOS</b>                                          |                          |
| Pazukhina                                                    | 1.13 [0.44; 2.87]        |
| <b>Total (Random Effects)</b>                                | <b>1.13 [0.44; 2.87]</b> |
| <b>Prediction interval</b>                                   |                          |
| Heterogeneity: not applicable                                |                          |
| <b>Total (Random Effects)</b>                                | <b>1.12 [0.98; 1.28]</b> |
| <b>Prediction interval</b>                                   | <b>[0.85; 1.48]</b>      |
| Heterogeneity: $\chi^2_7 = 8.95$ ( $P = .26$ ), $I^2 = 22\%$ |                          |

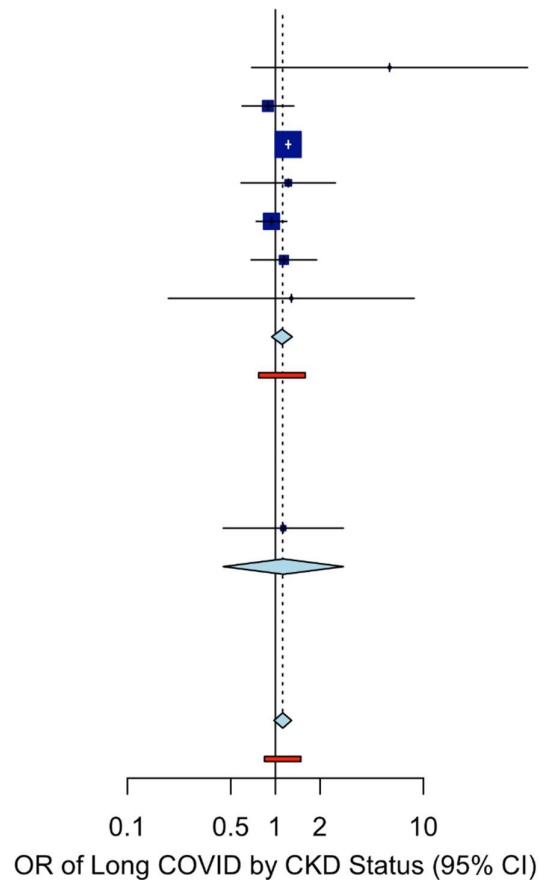

**eFigure 21.** Forest plot showing the association of IHD with post-COVID-19 condition. Individuals with IHD have an increased risk of developing post-COVID-19 condition.

| Source                                                      | OR (95% CI)              |
|-------------------------------------------------------------|--------------------------|
| Bellan et al.                                               | 1.72 [0.55; 5.36]        |
| Ioannou et al.                                              | 1.28 [1.18; 1.38]        |
| Jones et al.                                                | 1.26 [0.76; 2.08]        |
| Menezes et al.                                              | 1.50 [0.22; 10.17]       |
| Munblit et al.                                              | 1.32 [0.88; 1.98]        |
| <b>Total (Random Effects)</b>                               | <b>1.28 [1.19; 1.38]</b> |
| <b>Prediction interval</b>                                  | <b>[1.13; 1.45]</b>      |
| Heterogeneity: $\chi^2_4 = 0.31$ ( $P = .99$ ), $I^2 = 0\%$ |                          |

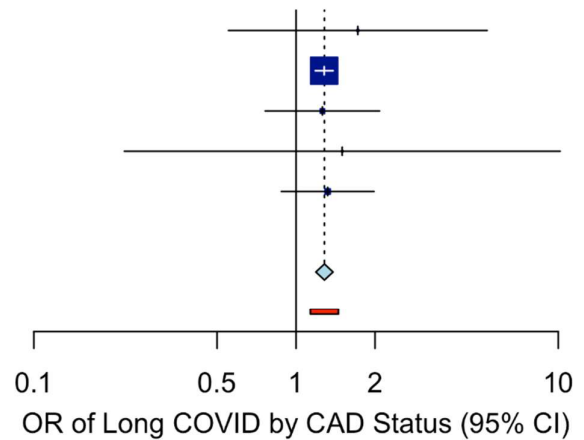

**eFigure 22.** Subgroup analysis of studies investigating the correlation of IHD and development of post-COVID-19 condition according to study quality (as per the Newcastle-Ottawa Scale)

| Source                                                      | OR (95% CI)               |
|-------------------------------------------------------------|---------------------------|
| <b>High NOS</b>                                             |                           |
| Bellan et al.                                               | 1.72 [0.55; 5.36]         |
| Ioannou et al.                                              | 1.28 [1.18; 1.38]         |
| Jones et al.                                                | 1.26 [0.76; 2.08]         |
| Munblit et al.                                              | 1.32 [0.88; 1.98]         |
| <b>Total (Random Effects)</b>                               | <b>1.28 [1.19; 1.38]</b>  |
| <b>Prediction interval</b>                                  | <b>[1.09; 1.51]</b>       |
| Heterogeneity: $\chi^2_3 = 0.28$ ( $P = .96$ ), $I^2 = 0\%$ |                           |
| <b>Moderate NOS</b>                                         |                           |
| Menezes et al.                                              | 1.50 [0.22; 10.17]        |
| <b>Total (Random Effects)</b>                               | <b>1.50 [0.22; 10.17]</b> |
| <b>Prediction interval</b>                                  |                           |
| Heterogeneity: not applicable                               |                           |
| <b>Total (Random Effects)</b>                               | <b>1.28 [1.19; 1.38]</b>  |
| <b>Prediction interval</b>                                  | <b>[1.13; 1.45]</b>       |
| Heterogeneity: $\chi^2_4 = 0.31$ ( $P = .99$ ), $I^2 = 0\%$ |                           |

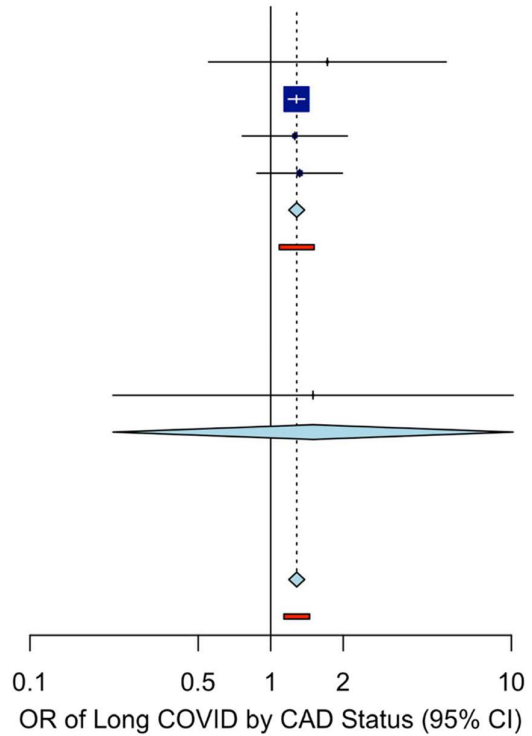

**eFigure 23.** Forest plot showing the association of immunosuppression with post-COVID-19 condition. Individuals with immunosuppression have an increased risk of developing post-COVID-19 condition.

| <b>Source</b>                                             | <b>OR (95% CI)</b>       |
|-----------------------------------------------------------|--------------------------|
| Blomberg et al.                                           | 2.64 [0.57; 12.23]       |
| Kisiel et al.                                             | 1.42 [0.97; 2.09]        |
| Wu et al.                                                 | 1.83 [0.51; 6.59]        |
| <b>Total (Random Effects)</b>                             | <b>1.50 [1.05; 2.15]</b> |
| <b>Prediction interval</b>                                | <b>[0.15; 15.41]</b>     |
| Heterogeneity: $\chi^2 = 0.69$ ( $P = .71$ ), $I^2 = 0\%$ |                          |

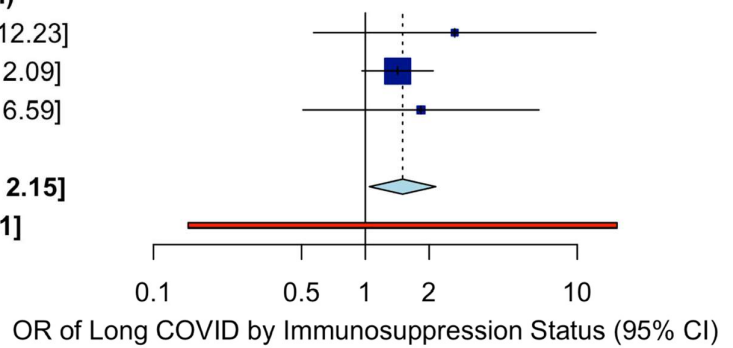

**eFigure 24.** Forest plot showing the association of anxiety/depression with post-COVID-19 condition. Individuals with anxiety/depression have an increased risk of developing post-COVID-19 condition.

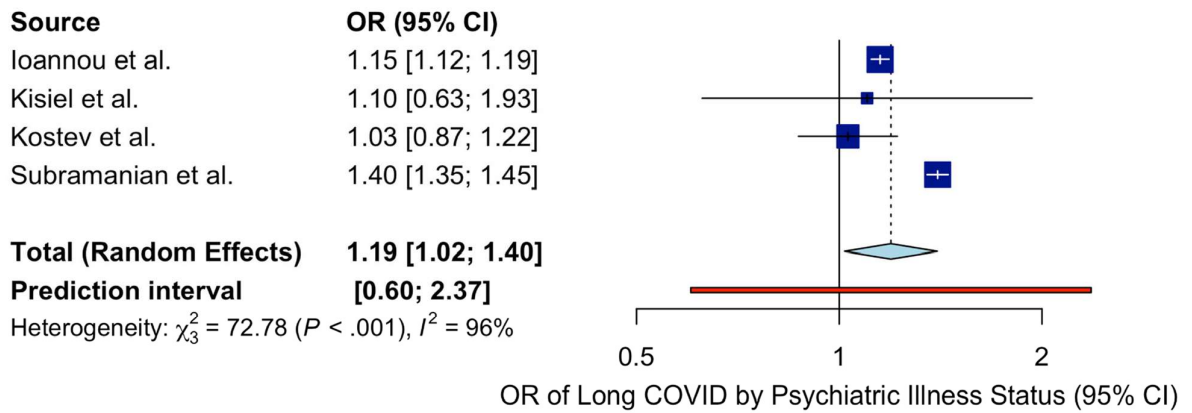

**eFigure 25.** Subgroup analysis of studies investigating the correlation of anxiety/depression and development of post-COVID-19 condition according to study quality (as per the Newcastle-Ottawa Scale)

| <b>Source</b>                                                  | <b>OR (95% CI)</b>       |
|----------------------------------------------------------------|--------------------------|
| <b>High NOS</b>                                                |                          |
| Ioannou et al.                                                 | 1.15 [1.12; 1.19]        |
| Kostev et al.                                                  | 1.03 [0.87; 1.22]        |
| Subramanian et al.                                             | 1.40 [1.35; 1.45]        |
| <b>Total (Random Effects)</b>                                  | <b>1.20 [1.02; 1.42]</b> |
| <b>Prediction interval</b>                                     | <b>[0.15; 9.37]</b>      |
| Heterogeneity: $\chi^2_2 = 72.6$ ( $P < .001$ ), $I^2 = 97\%$  |                          |
| <b>Moderate NOS</b>                                            |                          |
| Kisiel et al.                                                  | 1.10 [0.63; 1.93]        |
| <b>Total (Random Effects)</b>                                  | <b>1.10 [0.63; 1.93]</b> |
| <b>Prediction interval</b>                                     |                          |
| Heterogeneity: not applicable                                  |                          |
| <b>Total (Random Effects)</b>                                  | <b>1.19 [1.02; 1.40]</b> |
| <b>Prediction interval</b>                                     | <b>[0.60; 2.37]</b>      |
| Heterogeneity: $\chi^2_3 = 72.78$ ( $P < .001$ ), $I^2 = 96\%$ |                          |

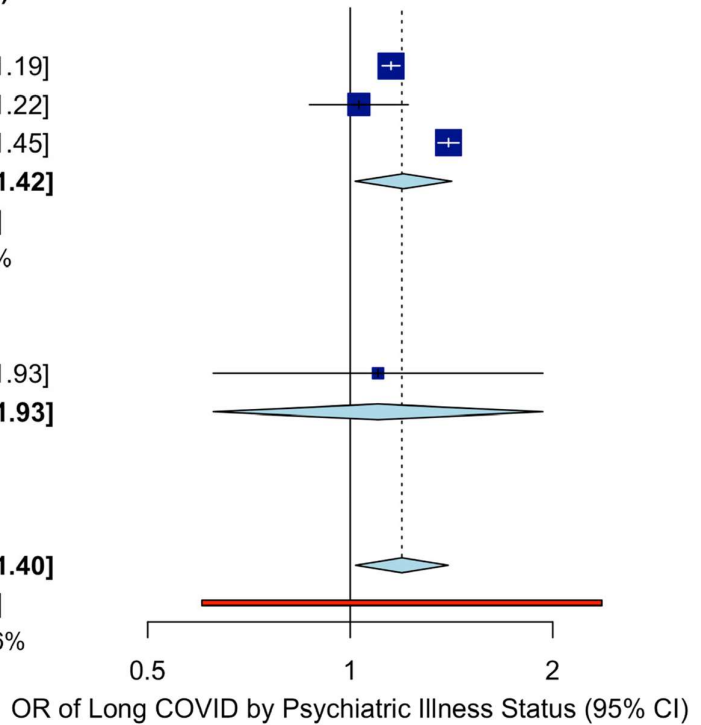



**eFigure 26.** Forest plot showing the association of hospitalisation with post-COVID-19 condition. Individuals that were hospitalized during the acute infection had an increased risk of developing post-COVID-19 condition.

| Source                                                         | OR (95% CI)              |
|----------------------------------------------------------------|--------------------------|
| Abdelrahman et al.                                             | 2.32 [0.79; 6.84]        |
| Baruch et al.                                                  | 3.10 [2.63; 3.65]        |
| Blomberg et al.                                                | 3.98 [2.21; 7.16]        |
| Emecen et al.                                                  | 1.44 [1.19; 1.75]        |
| Ioannou et al.                                                 | 2.60 [2.51; 2.69]        |
| Peters et al.                                                  | 1.20 [0.58; 2.48]        |
| Righi et al.                                                   | 2.65 [1.58; 4.44]        |
| Whitaker et al.                                                | 3.45 [2.57; 4.64]        |
| <b>Total (Random Effects)</b>                                  | <b>2.48 [1.97; 3.13]</b> |
| <b>Prediction interval</b>                                     | <b>[1.22; 5.06]</b>      |
| Heterogeneity: $\chi^2_7 = 50.25$ ( $P < .001$ ), $I^2 = 86\%$ |                          |

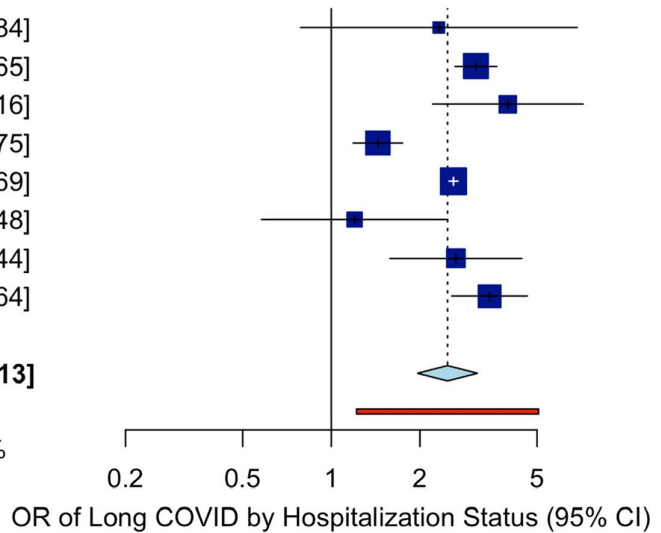

eFigure 27. Subgroup analysis of studies investigating the correlation of hospitalization and development of post-COVID-19 condition according to study quality (as per the Newcastle-Ottawa Scale)

| Source                                                         | OR (95% CI)              |
|----------------------------------------------------------------|--------------------------|
| <b>High NOS</b>                                                |                          |
| Abdelrahman et al.                                             | 2.32 [0.79; 6.84]        |
| Baruch et al.                                                  | 3.10 [2.63; 3.65]        |
| Blomberg et al.                                                | 3.98 [2.21; 7.16]        |
| Emecen et al.                                                  | 1.44 [1.19; 1.75]        |
| Ioannou et al.                                                 | 2.60 [2.51; 2.69]        |
| Righi et al.                                                   | 2.65 [1.58; 4.44]        |
| Whitaker et al.                                                | 3.45 [2.57; 4.64]        |
| <b>Total (Random Effects)</b>                                  | <b>2.61 [2.07; 3.31]</b> |
| <b>Prediction interval</b>                                     | <b>[1.26; 5.43]</b>      |
| Heterogeneity: $\chi^2_6 = 45.98$ ( $P < .001$ ), $I^2 = 87\%$ |                          |
| <b>Moderate NOS</b>                                            |                          |
| Peters et al.                                                  | 1.20 [0.58; 2.48]        |
| <b>Total (Random Effects)</b>                                  | <b>1.20 [0.58; 2.48]</b> |
| <b>Prediction interval</b>                                     |                          |
| Heterogeneity: not applicable                                  |                          |
| <b>Total (Random Effects)</b>                                  | <b>2.48 [1.97; 3.13]</b> |
| <b>Prediction interval</b>                                     | <b>[1.22; 5.06]</b>      |
| Heterogeneity: $\chi^2_7 = 50.25$ ( $P < .001$ ), $I^2 = 86\%$ |                          |

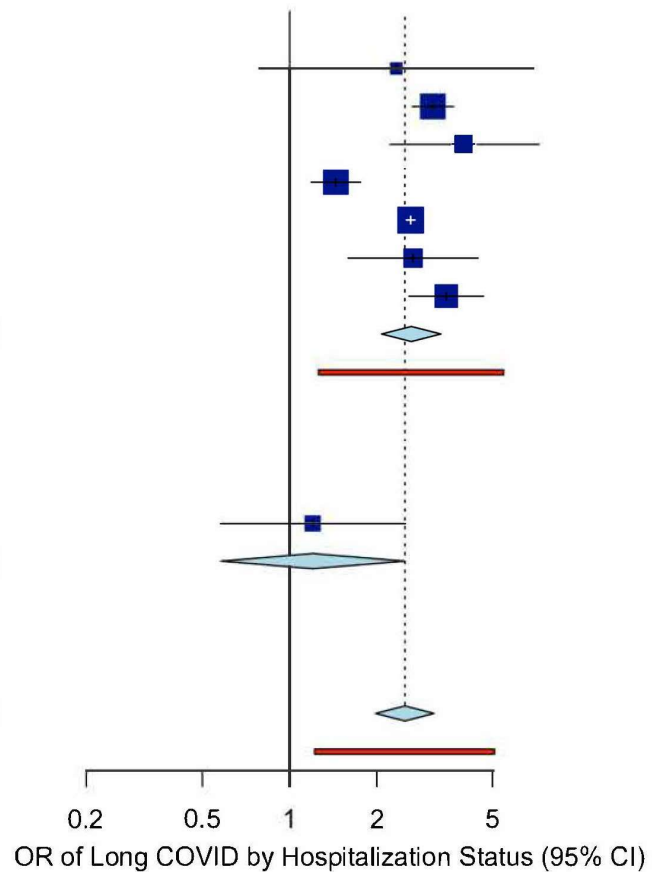

**eFigure 28.** Forest plot showing the association of ICU admission with post-COVID-19 condition. Individuals that required ICU admission during the acute infection had an increased risk of developing post-COVID-19 condition.

| Source                                                      | OR (95% CI)              |
|-------------------------------------------------------------|--------------------------|
| Asadi-Pooya                                                 | 1.79 [1.03; 3.13]        |
| Bellan et al., 2021                                         | 1.47 [0.42; 5.10]        |
| Dias                                                        | 1.68 [1.16; 2.44]        |
| Emecen                                                      | 2.18 [1.51; 3.14]        |
| Fernandez-de-las-Penas et al. 1                             | 1.24 [0.44; 3.50]        |
| Ioannou                                                     | 2.46 [2.25; 2.68]        |
| Jones                                                       | 1.29 [0.42; 3.98]        |
| Peghin                                                      | 3.10 [1.18; 8.13]        |
| Peters                                                      | 2.40 [0.48; 11.95]       |
| Righi                                                       | 2.35 [1.15; 4.80]        |
| <b>Total (Random Effects)</b>                               | <b>2.37 [2.18; 2.56]</b> |
| <b>Prediction interval</b>                                  | <b>[2.15; 2.60]</b>      |
| Heterogeneity: $\chi^2_9 = 8.64$ ( $P = .47$ ), $I^2 = 0\%$ |                          |

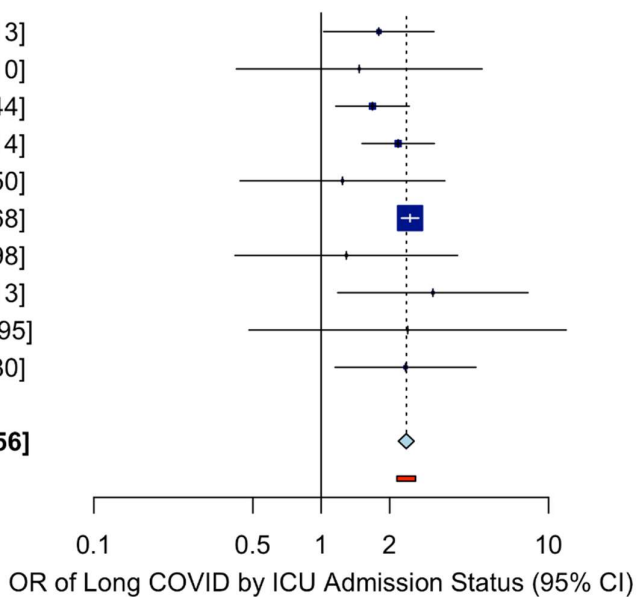

eFigure 29. Subgroup analysis of studies investigating the correlation of ICU admission and development of post-COVID-19 condition according to study quality (as per the Newcastle-Ottawa Scale)

| Source                                                      | OR (95% CI)              |
|-------------------------------------------------------------|--------------------------|
| <b>Moderate NOS</b>                                         |                          |
| Asadi-Pooya                                                 | 1.79 [1.03; 3.13]        |
| Peters                                                      | 2.40 [0.48; 11.95]       |
| <b>Total (Random Effects)</b>                               | <b>1.85 [1.09; 3.14]</b> |
| <b>Prediction interval</b>                                  |                          |
| Heterogeneity: $\chi^2_1 = 0.11$ ( $P = .74$ ), $I^2 = 0\%$ |                          |
| <b>High NOS</b>                                             |                          |
| Bellan et al., 2021                                         | 1.47 [0.42; 5.10]        |
| Dias                                                        | 1.68 [1.16; 2.44]        |
| Emecen                                                      | 2.18 [1.51; 3.14]        |
| Fernandez-de-las-Penas et al. 1                             | 1.24 [0.44; 3.50]        |
| Ioannou                                                     | 2.46 [2.25; 2.68]        |
| Jones                                                       | 1.29 [0.42; 3.98]        |
| Peghin                                                      | 3.10 [1.18; 8.13]        |
| Righi                                                       | 2.35 [1.15; 4.80]        |
| <b>Total (Random Effects)</b>                               | <b>2.27 [1.99; 2.59]</b> |
| <b>Prediction interval</b>                                  |                          |
| <b>[1.80; 2.88]</b>                                         |                          |
| Heterogeneity: $\chi^2_7 = 7.67$ ( $P = .36$ ), $I^2 = 9\%$ |                          |
| <b>Total (Random Effects)</b>                               | <b>2.37 [2.18; 2.56]</b> |
| <b>Prediction interval</b>                                  |                          |
| <b>[2.15; 2.60]</b>                                         |                          |
| Heterogeneity: $\chi^2_9 = 8.64$ ( $P = .47$ ), $I^2 = 0\%$ |                          |

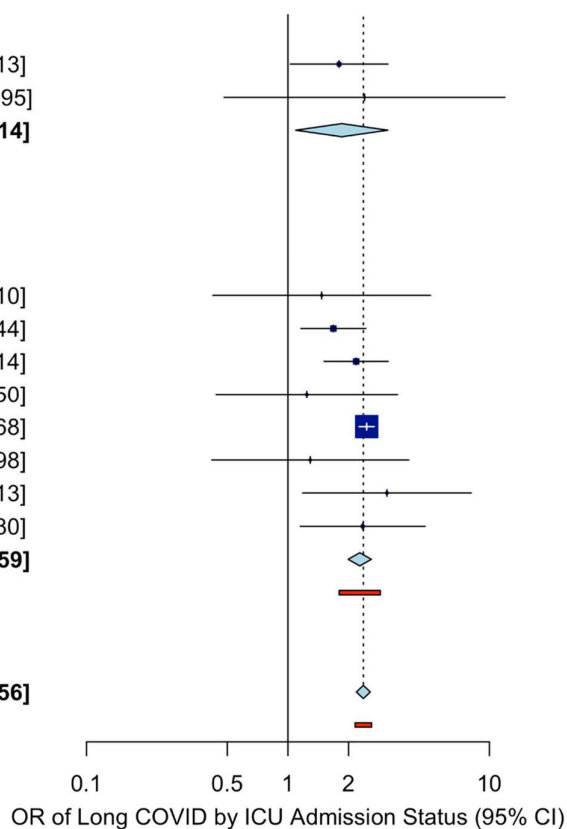

**eFigure 30.** Subgroup analysis of studies investigating the correlation of ICU admission and development of post-COVID-19 condition according to study size

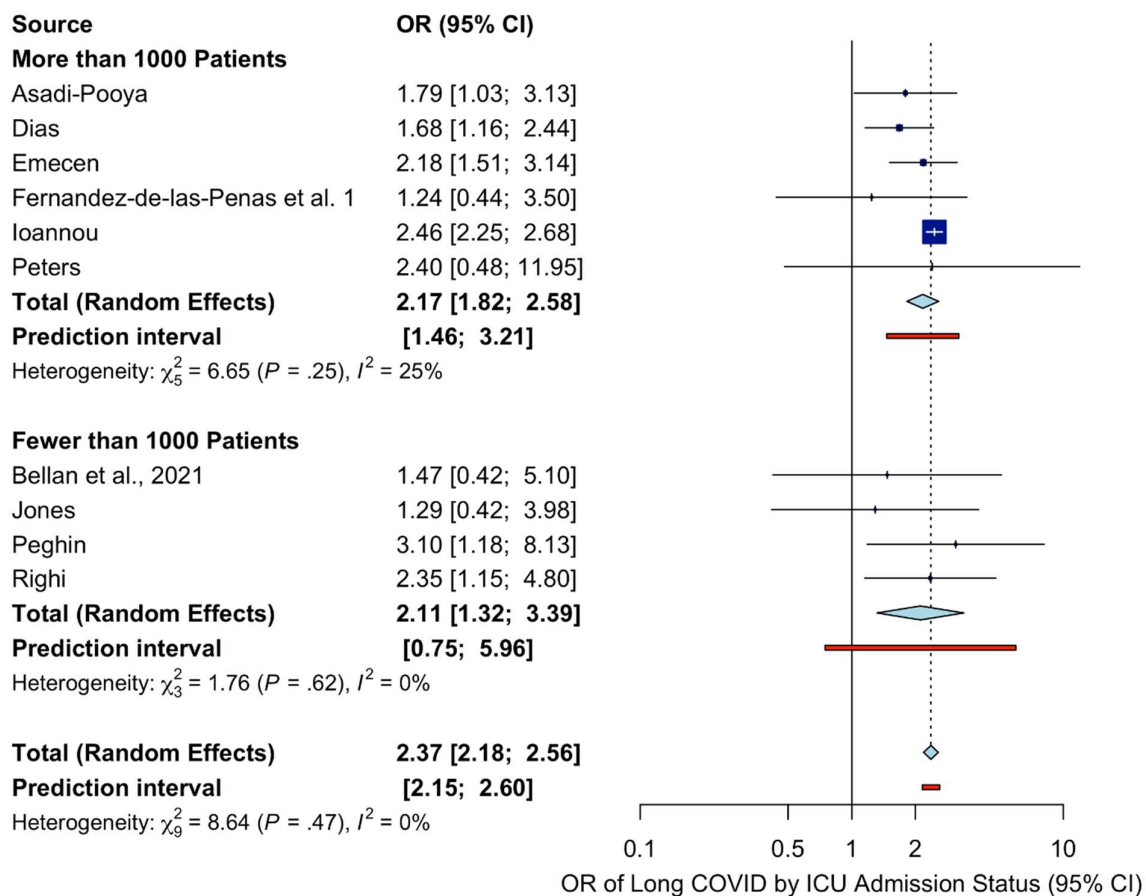

**eFigure 31.** Sensitivity analysis of all the risk factors examined using only the studies that included patients with laboratory confirmed COVID-19 infection

a. Female Sex

| Source                        | OR (95% CI)        |
|-------------------------------|--------------------|
| Abdelrahman et al.            | 1.72 [0.78; 3.79]  |
| Aranda et al.                 | 3.50 [1.21; 10.13] |
| Asadi-Pooya et al.            | 1.42 [1.05; 1.91]  |
| Augustin et al.               | 1.69 [1.02; 2.79]  |
| Baruch et al.                 | 2.50 [2.21; 2.83]  |
| Bellan et al.                 | 1.22 [0.61; 2.44]  |
| Blomberg et al.               | 2.02 [1.12; 3.66]  |
| Chudzik et al.                | 1.48 [1.19; 1.84]  |
| Daitch et al.                 | 1.87 [1.52; 2.31]  |
| Debski et al.                 | 1.99 [1.47; 2.70]  |
| Dias et al.                   | 1.49 [1.09; 2.03]  |
| Emecen et al.                 | 1.74 [1.57; 1.93]  |
| Estrada-Comecido et al.       | 1.46 [0.94; 2.27]  |
| Fernandez-de-las-Penas et al. | 2.54 [1.67; 3.86]  |
| Ioannou et al.                | 1.03 [0.99; 1.08]  |
| Kisiel et al.                 | 1.61 [0.70; 3.73]  |
| Kostev et al.                 | 1.23 [1.15; 1.32]  |
| Munblit et al.                | 1.88 [1.49; 2.37]  |
| Pazukhina et al.              | 2.04 [1.57; 2.65]  |
| Peghin et al.                 | 1.55 [1.05; 2.28]  |
| Peters et al.                 | 1.60 [1.18; 2.17]  |
| Petersen et al.               | 1.00 [0.98; 1.02]  |
| Righi et al.                  | 0.97 [0.59; 1.59]  |
| Silverberg et al.             | 1.99 [1.09; 3.63]  |
| Stepanek et al.               | 1.48 [1.06; 2.07]  |
| Subramanian et al.            | 1.61 [1.35; 1.92]  |
| Tleyjeh et al.                | 1.96 [0.92; 4.17]  |
| Whitaker et al.               | 1.38 [1.32; 1.45]  |
| Wu et al.                     | 1.08 [0.53; 2.21]  |
| Zhang et al.                  | 1.27 [1.06; 1.52]  |

**Total (fixed effect)** 1.11 [1.09; 1.13]  
**Total (random effects)** 1.56 [1.40; 1.74]  
**Prediction interval** [0.93; 2.63]  
 Heterogeneity:  $\chi^2_{29} = 603.11$  ( $P < .001$ ),  $I^2 = 95\%$

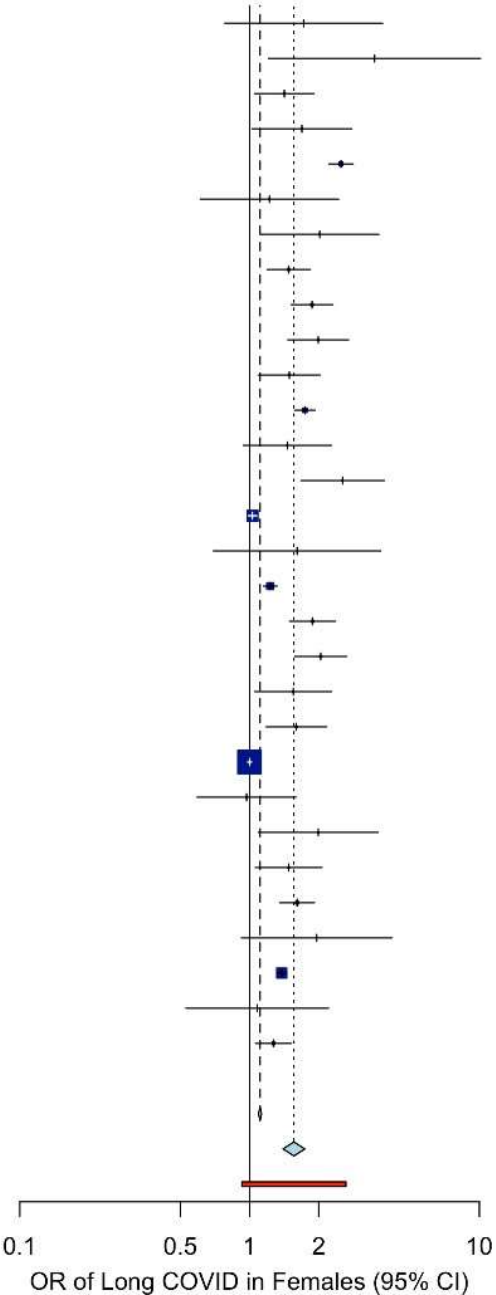

b. age

| Source                                                             | OR (95% CI)              |
|--------------------------------------------------------------------|--------------------------|
| <b>Patients between 40-69 years old</b>                            |                          |
| Emecen et al. 45-54                                                | 1.41 [1.16; 1.71]        |
| Emecen et al. 55-64                                                | 1.34 [1.07; 1.68]        |
| Ioannou et al. 50-69                                               | 1.25 [1.19; 1.31]        |
| Kostev et al. 46-60                                                | 2.10 [1.81; 2.44]        |
| Silverberg et al. 50-60                                            | 0.95 [0.50; 1.81]        |
| Subramanian et al. 40-49                                           | 0.98 [0.95; 1.01]        |
| Subramanian et al. 50-59                                           | 0.94 [0.91; 0.97]        |
| Subramanian et al. 60-69                                           | 0.91 [0.87; 0.95]        |
| TwinsUK 45-69                                                      | 1.76 [0.98; 3.16]        |
| Usoc 45-69                                                         | 1.10 [0.56; 2.16]        |
| Wu 45-64                                                           | 0.76 [0.27; 2.14]        |
| <b>Total (Random Effects)</b>                                      | <b>1.19 [1.06; 1.35]</b> |
| <b>Prediction interval</b>                                         | <b>[0.81; 1.76]</b>      |
| Heterogeneity: $\chi^2_{10} = 233.66$ ( $P < .001$ ), $I^2 = 96\%$ |                          |
| <b>Patients 70 years old or older</b>                              |                          |
| Emecen et al. 75                                                   | 0.90 [0.61; 1.33]        |
| GS 70                                                              | 0.74 [0.19; 2.92]        |
| Ioannou et al. 70-74                                               | 1.28 [1.22; 1.34]        |
| Ioannou et al. 75-79                                               | 1.32 [1.24; 1.41]        |
| Ioannou et al. 80-84                                               | 1.38 [1.28; 1.49]        |
| Ioannou et al. 85-89                                               | 1.26 [1.15; 1.38]        |
| Ioannou et al. >90                                                 | 1.21 [1.09; 1.34]        |
| Kostev et al. >70                                                  | 1.54 [1.23; 1.93]        |
| Silverberg et al. >70                                              | 0.69 [0.13; 3.66]        |
| Subramanian et al. >70                                             | 0.94 [0.89; 0.99]        |
| Wu et al. >65                                                      | 0.94 [0.26; 3.40]        |
| <b>Total (Random Effects)</b>                                      | <b>1.22 [1.08; 1.37]</b> |
| <b>Prediction interval</b>                                         | <b>[0.83; 1.78]</b>      |
| Heterogeneity: $\chi^2_{10} = 118.51$ ( $P < .001$ ), $I^2 = 92\%$ |                          |
| <b>Total (Random Effects)</b>                                      | <b>1.21 [1.10; 1.32]</b> |
| <b>Prediction interval</b>                                         | <b>[0.83; 1.75]</b>      |
| Heterogeneity: $\chi^2_{21} = 471.97$ ( $P < .001$ ), $I^2 = 96\%$ |                          |

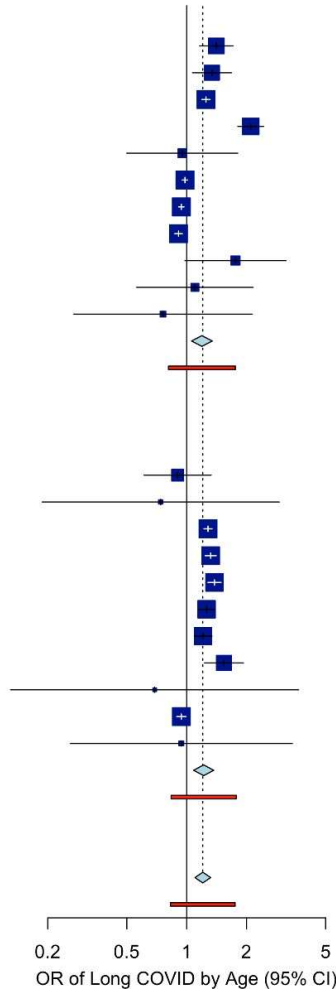

c. Obesity

| Source                                                             | OR (95% CI)              |
|--------------------------------------------------------------------|--------------------------|
| Bellan et al.                                                      | 2.70 [0.81; 9.00]        |
| Daitch et al.                                                      | 1.64 [1.28; 2.10]        |
| Dias et al.                                                        | 1.03 [1.01; 1.05]        |
| Fernandez-de-las-Penas et al.                                      | 0.85 [0.15; 4.80]        |
| Ioannou et al.                                                     | 1.09 [1.05; 1.14]        |
| Kisiel et al.                                                      | 2.62 [0.67; 10.21]       |
| Kostev et al.                                                      | 1.09 [0.95; 1.26]        |
| Menezes et al.                                                     | 6.20 [1.13; 34.06]       |
| Munblit et al.                                                     | 1.29 [0.98; 1.70]        |
| Peters et al.                                                      | 1.10 [0.83; 1.46]        |
| Petersen et al.                                                    | 1.08 [0.99; 1.18]        |
| Stepanek et al.                                                    | 1.02 [0.99; 1.05]        |
| Subramanian et al.                                                 | 1.14 [1.11; 1.17]        |
| Whitaker et al.                                                    | 1.39 [1.31; 1.47]        |
| Wu et al.                                                          | 5.44 [2.12; 13.96]       |
| <b>Total (Random Effects)</b>                                      | <b>1.16 [1.08; 1.24]</b> |
| <b>Prediction interval</b>                                         | <b>[0.94; 1.43]</b>      |
| Heterogeneity: $\chi^2_{14} = 161.88$ ( $P < .001$ ), $I^2 = 91\%$ |                          |

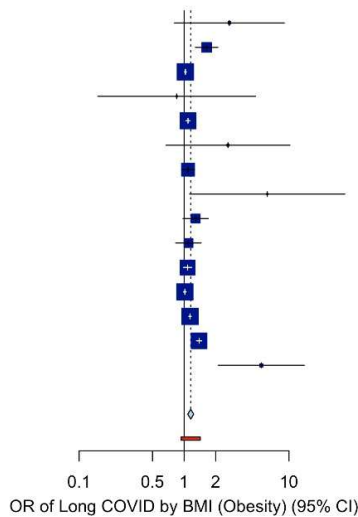

d. Smoking

| Source                                                         | OR (95% CI)              |
|----------------------------------------------------------------|--------------------------|
| Abdelrahman et al.                                             | 1.56 [0.51; 4.76]        |
| Aranda et al.                                                  | 1.20 [0.48; 3.01]        |
| Blomberg et al.                                                | 1.31 [0.79; 2.17]        |
| Dias et al.                                                    | 1.42 [0.75; 2.68]        |
| Emecen et al.                                                  | 1.15 [1.02; 1.29]        |
| Fernandez-de-las-Penas et al.                                  | 1.35 [0.52; 3.51]        |
| Jones et al.                                                   | 1.43 [0.92; 2.22]        |
| Kisiel et al.                                                  | 1.17 [0.14; 9.47]        |
| Petersen et al.                                                | 1.74 [0.85; 3.56]        |
| Silverberg et al.                                              | 1.99 [0.92; 4.31]        |
| Subramanian et al.                                             | 1.09 [1.06; 1.12]        |
| Whitaker et al.                                                | 1.11 [1.03; 1.20]        |
| Wu et al.                                                      | 0.74 [0.28; 1.95]        |
| <b>Total (Random Effects)</b>                                  | <b>1.10 [1.07; 1.13]</b> |
| <b>Prediction interval</b>                                     | <b>[1.07; 1.13]</b>      |
| Heterogeneity: $\chi^2_{12} = 8.53$ ( $P = .74$ ), $I^2 = 0\%$ |                          |

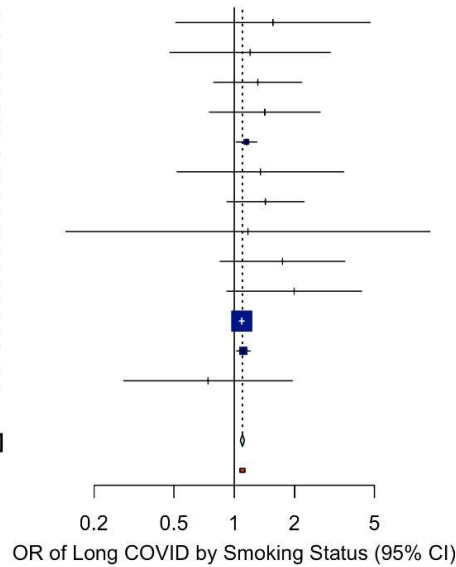

e. Asthma

| Source                                                         | OR (95% CI)              |
|----------------------------------------------------------------|--------------------------|
| Ioannou et al.                                                 | 1.32 [1.26; 1.38]        |
| Kostev et al.                                                  | 1.38 [1.19; 1.60]        |
| Subramanian et al.                                             | 1.17 [1.14; 1.21]        |
| Wu et al.                                                      | 0.96 [0.26; 3.58]        |
| <b>Total (Random Effects)</b>                                  | <b>1.27 [1.15; 1.40]</b> |
| <b>Prediction interval</b>                                     | <b>[0.84; 1.92]</b>      |
| Heterogeneity: $\chi^2_3 = 21.98$ ( $P < .001$ ), $I^2 = 86\%$ |                          |

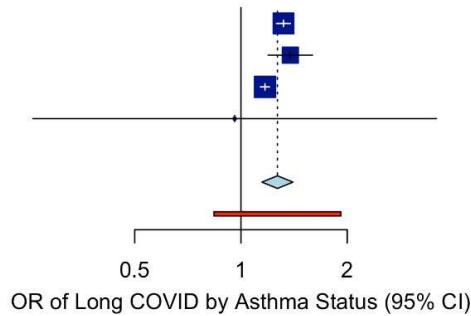

f. COPD

| Source                                                         | OR (95% CI)              |
|----------------------------------------------------------------|--------------------------|
| Aranda et al.                                                  | 1.59 [0.55; 4.60]        |
| Bellan et al.                                                  | 12.70 [1.41; 114.62]     |
| Daitch et al.                                                  | 1.98 [1.18; 3.33]        |
| Ioannou et al.                                                 | 1.42 [1.38; 1.47]        |
| Kostev et al.                                                  | 0.89 [0.76; 1.04]        |
| Menezes et al.                                                 | 4.30 [0.34; 54.95]       |
| Munblit et al.                                                 | 1.32 [0.88; 1.98]        |
| Pazukhina et al.                                               | 1.24 [0.77; 2.01]        |
| Wu et al.                                                      | 3.05 [0.38; 24.77]       |
| <b>Total (Random Effects)</b>                                  | <b>1.37 [1.05; 1.80]</b> |
| <b>Prediction interval</b>                                     | <b>[0.66; 2.87]</b>      |
| Heterogeneity: $\chi^2_8 = 40.03$ ( $P < .001$ ), $I^2 = 80\%$ |                          |

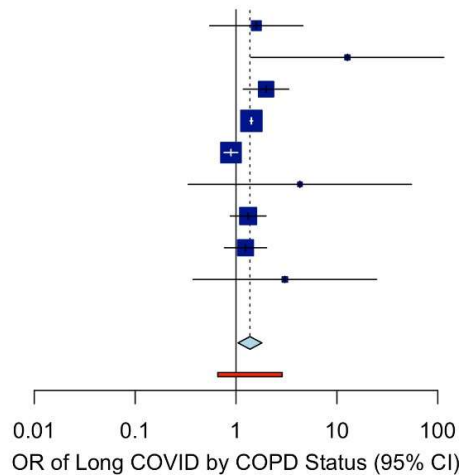



g. Diabetes

| Source                                                          | OR (95% CI)              |
|-----------------------------------------------------------------|--------------------------|
| Bellan et al.                                                   | 0.95 [0.35; 2.59]        |
| Blomberg et al.                                                 | 1.49 [0.41; 5.47]        |
| Dias et al.                                                     | 1.04 [0.78; 1.39]        |
| Fernandez-de-las-Penas et al.                                   | 1.07 [0.71; 1.62]        |
| Ioannou et al.                                                  | 1.07 [1.04; 1.11]        |
| Jones et al.                                                    | 1.07 [0.78; 1.46]        |
| Kostev et al.                                                   | 0.85 [0.73; 0.99]        |
| Menezes et al.                                                  | 1.50 [0.22; 10.17]       |
| Munblit et al.                                                  | 1.12 [0.81; 1.54]        |
| NCDS                                                            | 0.30 [0.04; 2.32]        |
| Pazukhina et al.                                                | 1.04 [0.71; 1.52]        |
| Wu et al.                                                       | 1.03 [0.36; 2.96]        |
| Yanksi et al.                                                   | 1.98 [0.80; 4.90]        |
| <b>Total (Random Effects)</b>                                   | <b>1.05 [1.00; 1.10]</b> |
| <b>Prediction interval</b>                                      | <b>[0.98; 1.12]</b>      |
| Heterogeneity: $\chi^2_{12} = 12.26$ ( $P = .42$ ), $I^2 = 2\%$ |                          |

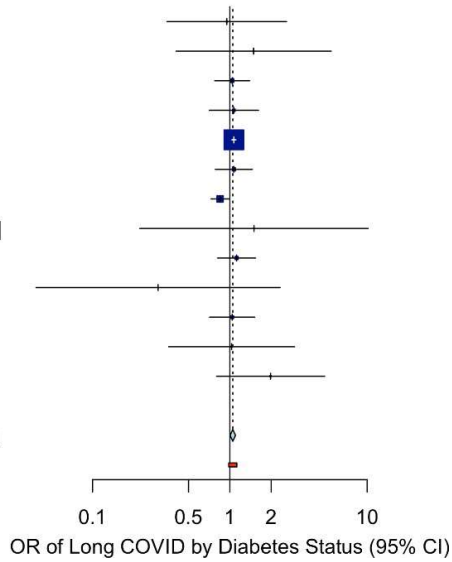

h. CKD

| Source                                                       | OR (95% CI)              |
|--------------------------------------------------------------|--------------------------|
| Bellan et al., 2021                                          | 5.90 [0.69; 50.40]       |
| Dias                                                         | 0.89 [0.60; 1.33]        |
| Ioannou                                                      | 1.22 [1.18; 1.27]        |
| Kostev                                                       | 0.94 [0.74; 1.19]        |
| Munblit et al., 2021                                         | 1.14 [0.68; 1.90]        |
| Pazukhina                                                    | 1.13 [0.44; 2.87]        |
| Wu                                                           | 1.28 [0.19; 8.65]        |
| <b>Total (Random Effects)</b>                                | <b>1.10 [0.94; 1.30]</b> |
| <b>Prediction interval</b>                                   | <b>[0.76; 1.59]</b>      |
| Heterogeneity: $\chi^2_6 = 8.95$ ( $P = .18$ ), $I^2 = 33\%$ |                          |

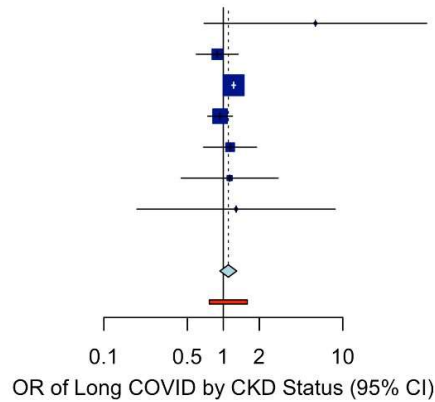

i. IHD

| Source                                                      | OR (95% CI)              |
|-------------------------------------------------------------|--------------------------|
| Bellan et al.                                               | 1.72 [0.55; 5.36]        |
| Ioannou et al.                                              | 1.28 [1.18; 1.38]        |
| Menezes et al.                                              | 1.50 [0.22; 10.17]       |
| Munblit et al.                                              | 1.32 [0.88; 1.98]        |
| <b>Total (Random Effects)</b>                               | <b>1.28 [1.19; 1.39]</b> |
| <b>Prediction interval</b>                                  | <b>[1.08; 1.52]</b>      |
| Heterogeneity: $\chi^2_3 = 0.30$ ( $P = .96$ ), $I^2 = 0\%$ |                          |

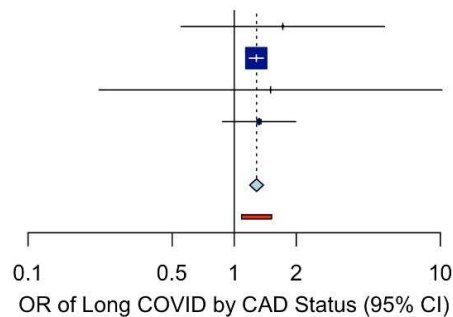

j. ICU admission

| Source                          | OR (95% CI)        |
|---------------------------------|--------------------|
| Asadi-Pooya                     | 1.79 [1.03; 3.13]  |
| Bellan et al., 2021             | 1.47 [0.42; 5.10]  |
| Dias                            | 1.68 [1.16; 2.44]  |
| Emecen                          | 2.18 [1.51; 3.14]  |
| Fernandez-de-las-Penas et al. 1 | 1.24 [0.44; 3.50]  |
| Ioannou                         | 2.46 [2.25; 2.68]  |
| Peghin                          | 3.10 [1.18; 8.13]  |
| Peters                          | 2.40 [0.48; 11.95] |
| Righi                           | 2.35 [1.15; 4.80]  |

**Total (Random Effects)**      **2.37 [2.19; 2.57]**  
**Prediction interval**            **[2.15; 2.62]**

Heterogeneity:  $\chi^2_8 = 7.52$  ( $P = .48$ ),  $I^2 = 0\%$

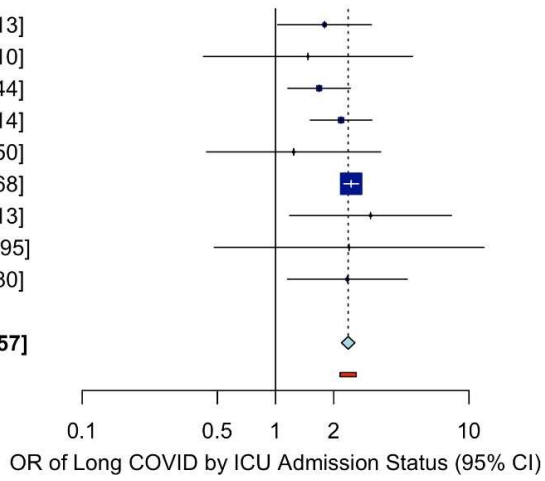

**eFigure 32.** Sensitivity analysis of all the risk factors excluding studies with many variables in each study (A study was defined as having many variables when they included  $\geq 5$  variables in their analysis)

a. Female Sex

| Source                                                             | OR (95% CI)              |
|--------------------------------------------------------------------|--------------------------|
| BCS 70                                                             | 1.67 [0.56; 4.98]        |
| Bellan et al.                                                      | 1.22 [0.61; 2.44]        |
| Blomberg et al.                                                    | 2.02 [1.12; 3.66]        |
| Dias et al.                                                        | 1.49 [1.09; 2.03]        |
| Emecen et al.                                                      | 1.74 [1.57; 1.93]        |
| Fernandez-de-las-Penas et al.                                      | 2.54 [1.67; 3.86]        |
| GS                                                                 | 1.73 [0.91; 3.29]        |
| Ioannou et al.                                                     | 1.03 [0.99; 1.08]        |
| Jones et al.                                                       | 1.47 [1.06; 2.03]        |
| Kisiel et al.                                                      | 1.61 [0.70; 3.73]        |
| Kostev et al.                                                      | 1.23 [1.15; 1.32]        |
| Munblit et al.                                                     | 1.88 [1.49; 2.37]        |
| Subramanian et al.                                                 | 1.61 [1.35; 1.92]        |
| TwinsUK                                                            | 1.75 [0.73; 4.20]        |
| Usoc                                                               | 1.89 [1.03; 3.48]        |
| Wu et al.                                                          | 1.08 [0.53; 2.21]        |
| <b>Total (fixed effect)</b>                                        | <b>1.19 [1.15; 1.23]</b> |
| <b>Total (random effects)</b>                                      | <b>1.54 [1.32; 1.81]</b> |
| <b>Prediction interval</b>                                         | <b>[0.89; 2.69]</b>      |
| Heterogeneity: $\chi^2_{15} = 146.11$ ( $P < .001$ ), $I^2 = 90\%$ |                          |

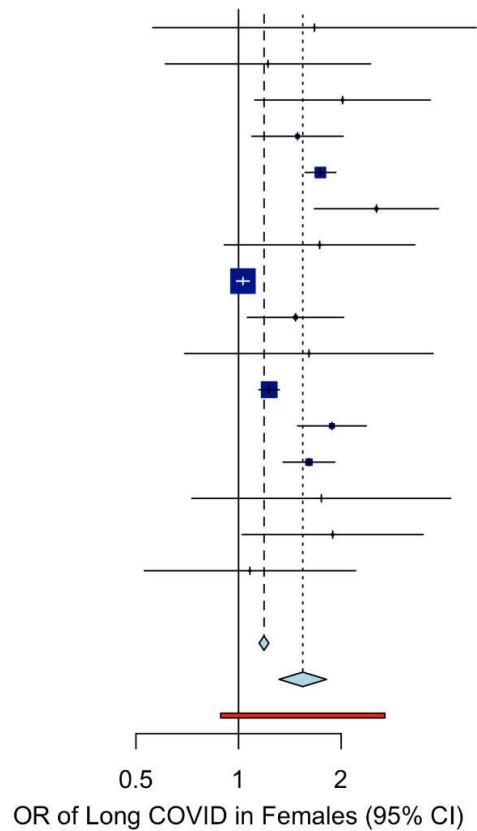

b. Age

| Source                                                             | OR (95% CI)              |
|--------------------------------------------------------------------|--------------------------|
| <b>Patients between 40-69 years old</b>                            |                          |
| Emecen et al. 45-54                                                | 1.41 [1.16; 1.71]        |
| Emecen et al. 55-64                                                | 1.34 [1.07; 1.68]        |
| GS 45-69                                                           | 1.10 [0.50; 2.43]        |
| Ioannou et al. 50-69                                               | 1.25 [1.19; 1.31]        |
| Kostev et al. 46-60                                                | 2.10 [1.81; 2.44]        |
| Subramanian et al. 40-49                                           | 0.98 [0.95; 1.01]        |
| Subramanian et al. 50-59                                           | 0.94 [0.91; 0.97]        |
| Subramanian et al. 60-69                                           | 0.91 [0.87; 0.95]        |
| TwinsUK 45-69                                                      | 1.76 [0.98; 3.16]        |
| Usoc 45-69                                                         | 1.10 [0.56; 2.16]        |
| Wu 45-64                                                           | 0.76 [0.27; 2.14]        |
| <b>Total (Random Effects)</b>                                      | <b>1.20 [1.06; 1.35]</b> |
| <b>Prediction interval</b>                                         | <b>[0.81; 1.77]</b>      |
| Heterogeneity: $\chi^2_{10} = 233.68$ ( $P < .001$ ), $I^2 = 96\%$ |                          |

|                                                                    |                          |
|--------------------------------------------------------------------|--------------------------|
| <b>Patients 70 years old or older</b>                              |                          |
| Emecen et al. 75                                                   | 0.90 [0.61; 1.33]        |
| GS 70                                                              | 0.74 [0.19; 2.92]        |
| Ioannou et al. 70-74                                               | 1.28 [1.22; 1.34]        |
| Ioannou et al. 75-79                                               | 1.32 [1.24; 1.41]        |
| Ioannou et al. 80-84                                               | 1.38 [1.28; 1.49]        |
| Ioannou et al. 85-89                                               | 1.26 [1.15; 1.38]        |
| Ioannou et al. >90                                                 | 1.21 [1.09; 1.34]        |
| Kostev et al. >70                                                  | 1.54 [1.23; 1.93]        |
| Subramanian et al. >70                                             | 0.94 [0.89; 0.99]        |
| TwinsUK >70                                                        | 1.05 [0.47; 2.36]        |
| Usoc >70                                                           | 2.62 [1.25; 5.51]        |
| Wu et al. >65                                                      | 0.94 [0.26; 3.40]        |
| <b>Total (Random Effects)</b>                                      | <b>1.24 [1.10; 1.39]</b> |
| <b>Prediction interval</b>                                         | <b>[0.85; 1.80]</b>      |
| Heterogeneity: $\chi^2_{11} = 122.44$ ( $P < .001$ ), $I^2 = 91\%$ |                          |

|                                                                    |                          |
|--------------------------------------------------------------------|--------------------------|
| <b>Total (Random Effects)</b>                                      | <b>1.22 [1.11; 1.34]</b> |
| <b>Prediction interval</b>                                         | <b>[0.84; 1.77]</b>      |
| Heterogeneity: $\chi^2_{22} = 477.26$ ( $P < .001$ ), $I^2 = 95\%$ |                          |

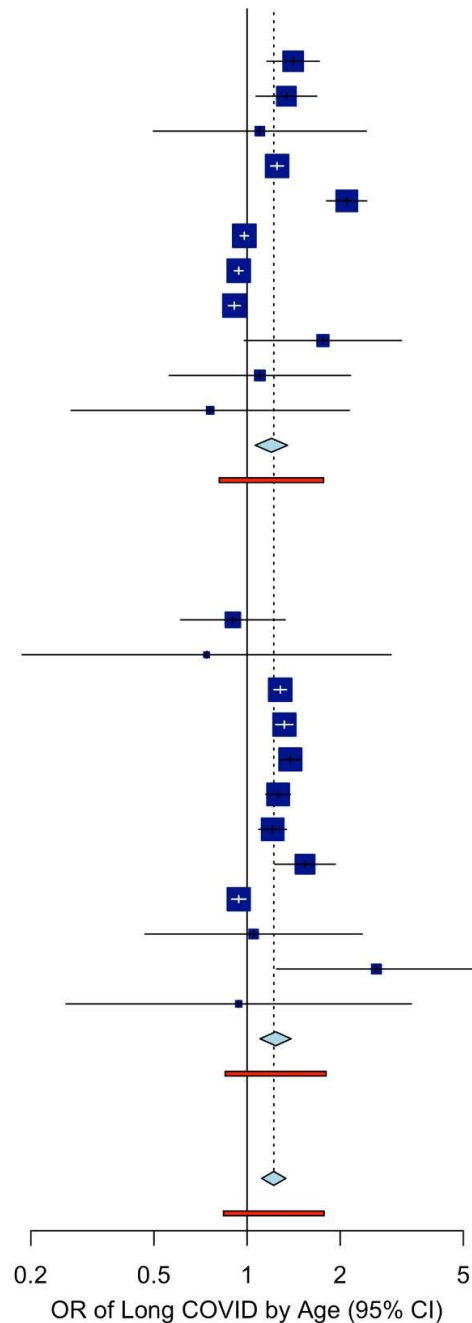

c. Obesity

| Source                                                            | OR (95% CI)              |
|-------------------------------------------------------------------|--------------------------|
| Bellan et al.                                                     | 2.70 [0.81; 9.00]        |
| Dias et al.                                                       | 1.03 [1.01; 1.05]        |
| Fernandez-de-las-Penas et al.                                     | 0.85 [0.15; 4.80]        |
| Ioannou et al.                                                    | 1.09 [1.05; 1.14]        |
| Jones et al.                                                      | 1.05 [0.80; 1.37]        |
| Kisiel et al.                                                     | 2.62 [0.67; 10.21]       |
| Kostev et al.                                                     | 1.09 [0.95; 1.26]        |
| Menezes et al.                                                    | 6.20 [1.13; 34.06]       |
| Munblit et al.                                                    | 1.29 [0.98; 1.70]        |
| Subramanian et al.                                                | 1.14 [1.11; 1.17]        |
| Wu et al.                                                         | 5.44 [2.12; 13.96]       |
| <b>Total (Random Effects)</b>                                     | <b>1.11 [1.04; 1.19]</b> |
| <b>Prediction interval</b>                                        | <b>[0.93; 1.32]</b>      |
| Heterogeneity: $\chi^2_{10} = 59.48$ ( $P < .001$ ), $I^2 = 83\%$ |                          |

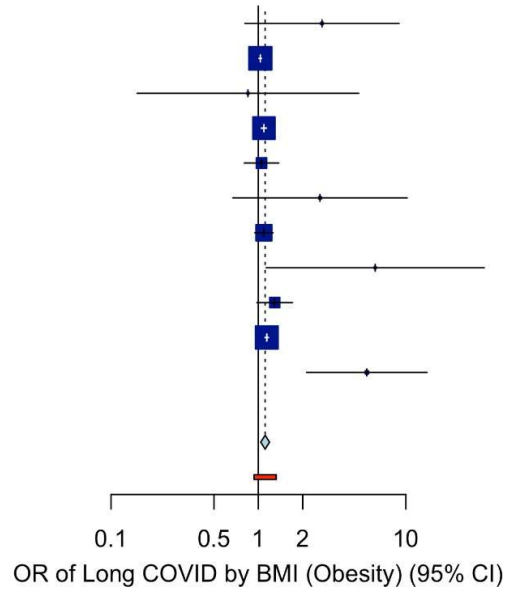

d. Smoking

| Source                                                      | OR (95% CI)              |
|-------------------------------------------------------------|--------------------------|
| BCS70                                                       | 0.75 [0.22; 2.59]        |
| Blomberg et al.                                             | 1.31 [0.79; 2.17]        |
| Dias et al.                                                 | 1.42 [0.75; 2.68]        |
| Emecen et al.                                               | 1.15 [1.02; 1.29]        |
| Fernandez-de-las-Penas et al.                               | 1.35 [0.52; 3.51]        |
| GS                                                          | 0.91 [0.24; 3.45]        |
| Jones et al.                                                | 1.43 [0.92; 2.22]        |
| Kisiel et al.                                               | 1.17 [0.14; 9.47]        |
| Usoc                                                        | 1.44 [0.60; 3.44]        |
| Wu et al.                                                   | 0.74 [0.28; 1.95]        |
| <b>Total (Random Effects)</b>                               | <b>1.17 [1.05; 1.30]</b> |
| <b>Prediction interval</b>                                  | <b>[1.04; 1.33]</b>      |
| Heterogeneity: $\chi^2_9 = 3.22$ ( $P = .95$ ), $I^2 = 0\%$ |                          |

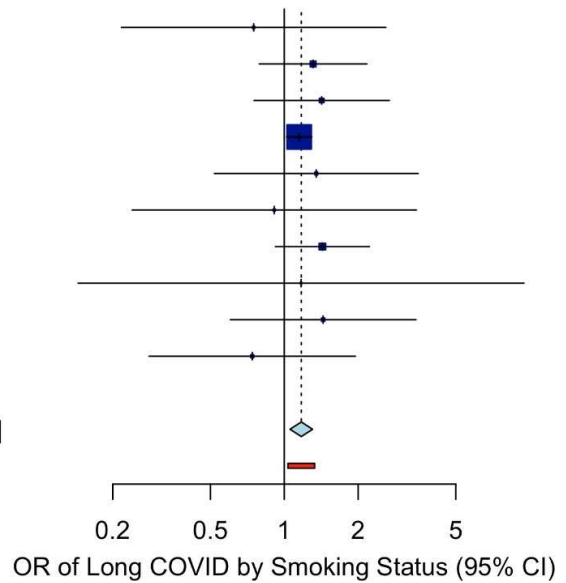

e. Asthma

| Source                                                         | OR (95% CI)              |
|----------------------------------------------------------------|--------------------------|
| Ioannou et al.                                                 | 1.32 [1.26; 1.38]        |
| GS                                                             | 1.21 [0.51; 2.87]        |
| Jones et al.                                                   | 1.06 [0.77; 1.46]        |
| Kostev et al.                                                  | 1.38 [1.19; 1.60]        |
| Subramanian et al.                                             | 1.17 [1.14; 1.21]        |
| TwinsUK                                                        | 1.30 [0.48; 3.53]        |
| Usoc                                                           | 1.01 [0.49; 2.08]        |
| Wu et al.                                                      | 0.96 [0.26; 3.58]        |
| <b>Total (Random Effects)</b>                                  | <b>1.25 [1.14; 1.36]</b> |
| <b>Prediction interval</b>                                     | <b>[1.01; 1.54]</b>      |
| Heterogeneity: $\chi^2_7 = 22.97$ ( $P = .002$ ), $I^2 = 70\%$ |                          |

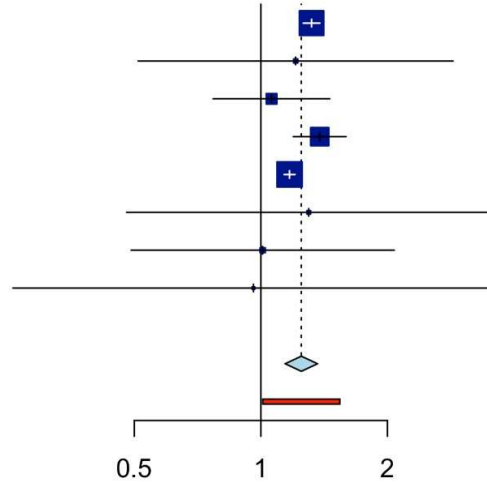

OR of Long COVID by Asthma Status (95% CI)

f. COPD

| Source                                                         | OR (95% CI)              |
|----------------------------------------------------------------|--------------------------|
| Bellan et al.                                                  | 12.70 [1.41; 114.62]     |
| Ioannou et al.                                                 | 1.42 [1.38; 1.47]        |
| Jones et al.                                                   | 1.53 [0.85; 2.75]        |
| Kostev et al.                                                  | 0.89 [0.76; 1.04]        |
| Munblit et al.                                                 | 1.32 [0.88; 1.98]        |
| Wu et al.                                                      | 3.05 [0.38; 24.77]       |
| <b>Total (Random Effects)</b>                                  | <b>1.31 [0.95; 1.82]</b> |
| <b>Prediction interval</b>                                     | <b>[0.51; 3.37]</b>      |
| Heterogeneity: $\chi^2_5 = 37.34$ ( $P < .001$ ), $I^2 = 87\%$ |                          |

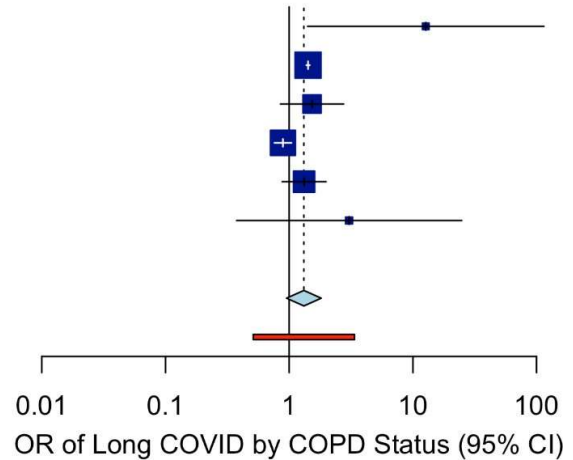

OR of Long COVID by COPD Status (95% CI)

g. Diabetes

| Source                                                          | OR (95% CI)              |
|-----------------------------------------------------------------|--------------------------|
| Bellan et al.                                                   | 0.95 [0.35; 2.59]        |
| Blomberg et al.                                                 | 1.49 [0.41; 5.47]        |
| Dias et al.                                                     | 1.04 [0.78; 1.39]        |
| Fernandez-de-las-Penas et al.                                   | 1.07 [0.71; 1.62]        |
| GS                                                              | 3.04 [0.49; 18.92]       |
| Ioannou et al.                                                  | 1.07 [1.04; 1.11]        |
| Jones et al.                                                    | 1.07 [0.78; 1.46]        |
| Kostev et al.                                                   | 0.85 [0.73; 0.99]        |
| Munblit et al.                                                  | 1.12 [0.81; 1.54]        |
| TwinsUK                                                         | 1.28 [0.25; 6.54]        |
| Usoc                                                            | 1.25 [0.44; 3.56]        |
| Wu et al.                                                       | 1.03 [0.36; 2.96]        |
| <b>Total (Random Effects)</b>                                   | <b>1.06 [1.03; 1.09]</b> |
| <b>Prediction interval</b>                                      | <b>[1.02; 1.10]</b>      |
| Heterogeneity: $\chi^2_{11} = 10.26$ ( $P = .51$ ), $I^2 = 0\%$ |                          |

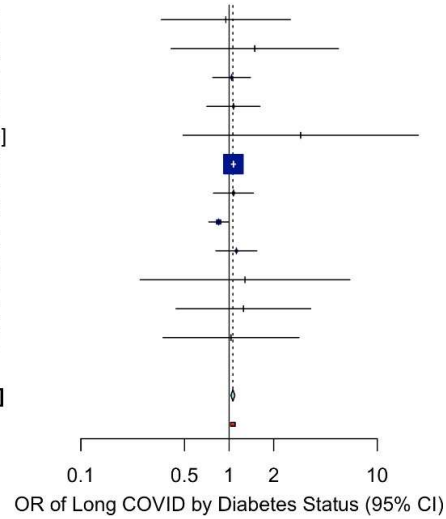

h. CKD

| Source                                                       | OR (95% CI)              |
|--------------------------------------------------------------|--------------------------|
| Bellan et al., 2021                                          | 5.90 [0.69; 50.40]       |
| Dias                                                         | 0.89 [0.60; 1.33]        |
| Ioannou                                                      | 1.22 [1.18; 1.27]        |
| Jones                                                        | 1.22 [0.59; 2.54]        |
| Kostev                                                       | 0.94 [0.74; 1.19]        |
| Munblit et al., 2021                                         | 1.14 [0.68; 1.90]        |
| Wu                                                           | 1.28 [0.19; 8.65]        |
| <b>Total (Random Effects)</b>                                | <b>1.11 [0.94; 1.30]</b> |
| <b>Prediction interval</b>                                   | <b>[0.77; 1.59]</b>      |
| Heterogeneity: $\chi^2_6 = 8.93$ ( $P = .18$ ), $I^2 = 33\%$ |                          |

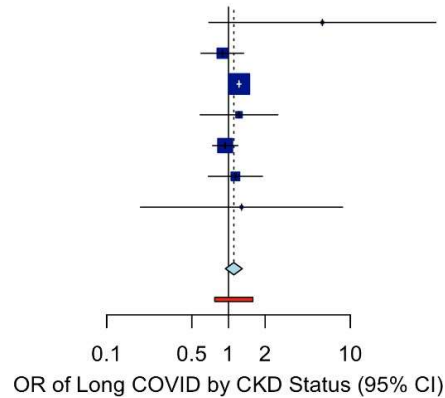

i. IHD

| Source                                                      | OR (95% CI)              |
|-------------------------------------------------------------|--------------------------|
| Bellan et al.                                               | 1.72 [0.55; 5.36]        |
| Ioannou et al.                                              | 1.28 [1.18; 1.38]        |
| Jones et al.                                                | 1.26 [0.76; 2.08]        |
| Munblit et al.                                              | 1.32 [0.88; 1.98]        |
| <b>Total (Random Effects)</b>                               | <b>1.28 [1.19; 1.38]</b> |
| <b>Prediction interval</b>                                  | <b>[1.09; 1.51]</b>      |
| Heterogeneity: $\chi^2_3 = 0.28$ ( $P = .96$ ), $I^2 = 0\%$ |                          |

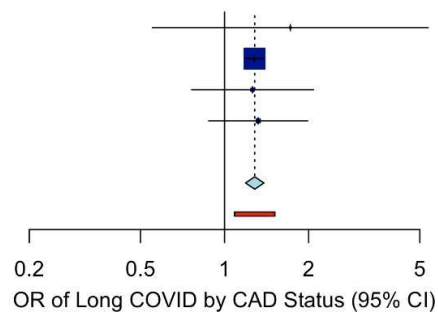

j. Hospitalisation

| Source                                                         | OR (95% CI)              |
|----------------------------------------------------------------|--------------------------|
| Blomberg et al.                                                | 3.98 [2.21; 7.16]        |
| Emecen et al.                                                  | 1.44 [1.19; 1.75]        |
| Ioannou et al.                                                 | 2.60 [2.51; 2.69]        |
| <b>Total (Random Effects)</b>                                  | <b>2.33 [1.43; 3.78]</b> |
| <b>Prediction interval</b>                                     | <b>[0.01; 901.31]</b>    |
| Heterogeneity: $\chi^2_2 = 37.13$ ( $P < .001$ ), $I^2 = 95\%$ |                          |

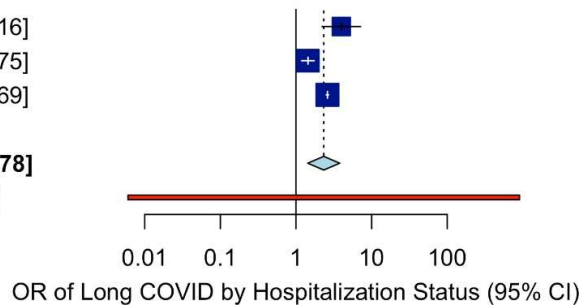

k. ICU admission

| Source                                                       | OR (95% CI)              |
|--------------------------------------------------------------|--------------------------|
| Bellan et al., 2021                                          | 1.47 [0.42; 5.10]        |
| Dias                                                         | 1.68 [1.16; 2.44]        |
| Emecen                                                       | 2.18 [1.51; 3.14]        |
| Fernandez-de-las-Penas et al. 1                              | 1.24 [0.44; 3.50]        |
| Ioannou                                                      | 2.46 [2.25; 2.68]        |
| Jones                                                        | 1.29 [0.42; 3.98]        |
| <b>Total (Random Effects)</b>                                | <b>2.10 [1.71; 2.58]</b> |
| <b>Prediction interval</b>                                   | <b>[1.29; 3.41]</b>      |
| Heterogeneity: $\chi^2_5 = 7.38$ ( $P = .19$ ), $I^2 = 32\%$ |                          |

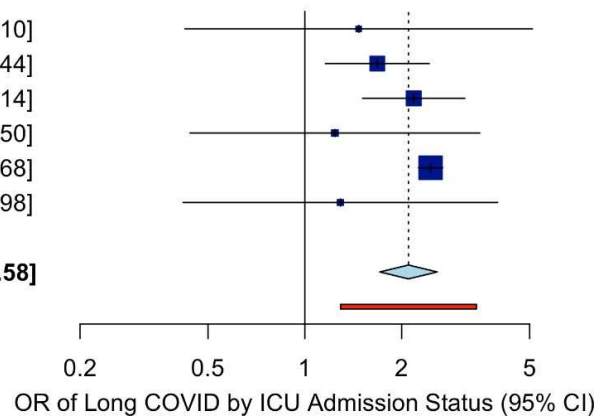

l. vaccination status

| Source                                                       | OR (95% CI)              |
|--------------------------------------------------------------|--------------------------|
| Ioannou                                                      | 0.78 [0.68; 0.90]        |
| Emecen                                                       | 0.53 [0.40; 0.71]        |
| <b>Total (Random Effects)</b>                                | <b>0.66 [0.45; 0.96]</b> |
| Heterogeneity: $\chi^2_1 = 5.41$ ( $P = .02$ ), $I^2 = 82\%$ |                          |

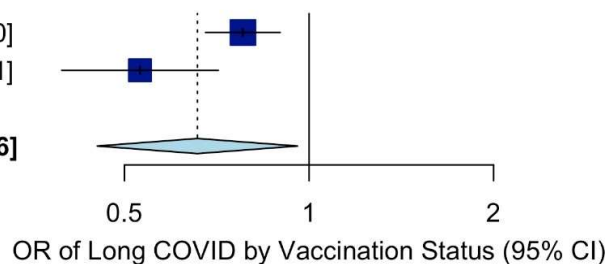

Supplement: jamainternmed-e230750-s001.pdf [file jamainternmed-e230750-s001.pdf]
