# Supplementary material
Source: PubMed Central journal article supplement (PMC10037203)
Supplement: jamainternmed-e230750-s002.pdf [file jamainternmed-e230750-s002.pdf]

## **Data Sharing Statement**

Tsampasian. Risk Factors Associated With Post–COVID-19 Condition. *JAMA Intern Med*.  
Published March 23, 2023. doi:10.1001/jamainternmed.2023.0750

### **Data**

**Data available:** No
